1           **Mps1 releases Mad1 from nuclear pores to ensure a robust**  
2           **mitotic checkpoint and accurate chromosome segregation**

3  
4           Mariana Osswald<sup>1,2,7</sup>, Sofia Cunha-Silva<sup>1,2,7</sup>, Jana Goemann<sup>1,2</sup>, João Barbosa<sup>1,2</sup>, Luis M  
5           Santos<sup>3</sup>, Pedro Resende<sup>1,2</sup>, Tanja Bange<sup>4</sup>, Claudio E Sunkel<sup>1,2,5,6</sup> and Carlos Conde<sup>1,2,6</sup>

6  
7           <sup>1</sup> i3S, Instituto de Investigação e Inovação em Saúde, Universidade do Porto, Porto, Portugal.

8           <sup>2</sup> IBMC, Instituto de Biologia Molecular e Celular, Universidade do Porto, Porto, Portugal.

9           <sup>3</sup> Faculty of Medicine, University of Geneva, Geneva, Switzerland.

10          <sup>4</sup> Institute for Medical Psychology, Ludwig Maximilian University of Munich, Munich,  
11          Germany

12          <sup>5</sup> ICBAS, Departamento de Biologia Molecular, Instituto de Ciências Biomédicas Abel  
13          Salazar, Porto, Portugal.

14  
15  
16  
17          <sup>6</sup> Author for correspondence:

18          Carlos Conde ([cconde@ibmc.up.pt](mailto:cconde@ibmc.up.pt)) ORCID: 0000-0002-4177-8519

19          Rua Alfredo Allen 208,

20          4200-135, Porto, Portugal

21          Tel: +351 220 408 800

22  
23          <sup>7</sup> These authors contributed equally to this work

24  
25  
26  
27  
28  
29  
30          **Running Title:** Mps1 at NPCs licenses Mad1 KT recruitment

31  
32          **Key words:**

33          Mps1, Megator/Tpr, Mad1, Mitosis, Spindle Assembly Checkpoint, Nuclear pores,

34          Kinetochores

35 **ABSTRACT**

36 The strength of the Spindle Assembly Checkpoint (SAC) depends on the amount of the  
37 Mad1-C-Mad2 heterotetramer at kinetochores but also on its binding to Megator/Tpr at  
38 nuclear pore complexes (NPCs) during interphase. However, the molecular underpinnings  
39 controlling the spatiotemporal redistribution of Mad1-C-Mad2 as cells progress into mitosis  
40 remain elusive. Here, we show that Mps1-mediated phosphorylation of Megator/Tpr  
41 abolishes its interaction with Mad1 *in vitro* and in *Drosophila* cells. Timely activation of  
42 Mps1 during prophase triggers Mad1 release from NPCs, which we find to be required for  
43 competent kinetochore recruitment of Mad1-C-Mad2 and robust checkpoint response.  
44 Importantly, preventing Mad1 binding to Megator/Tpr rescues the fidelity of chromosome  
45 segregation and aneuploidy in larval neuroblasts of *Drosophila mps1*-null mutants. Our  
46 findings demonstrate that the subcellular localization of Mad1 is stringently coordinated with  
47 cell cycle progression by kinetochore-extrinsic activity of Mps1. This ensures that both NPCs  
48 in interphase and kinetochores in mitosis can generate anaphase inhibitors to efficiently  
49 preserve genomic stability.

50

51

52

53

54

55

56

57

58

59

60

61

62

63

64

65

66

67

68

## 69 INTRODUCTION

70 The Spindle Assembly Checkpoint (SAC) safeguards eukaryotic cells against chromosome  
71 mis-segregation by restraining the transition to anaphase in the presence of unattached  
72 kinetochores. Pivotal to this signalling pathway, is the Mad1-Mad2 heterotetramer that  
73 catalyses the structural conversion of soluble open-Mad2 (O-Mad2) into closed-Mad2 (C-  
74 Mad2), a conformer that is able to bind the APC/C activator Cdc20 (De Antoni et al., 2005).  
75 This represents the rate-limiting step in the assembly of the mitotic checkpoint complex  
76 (MCC), a diffusible tetrameric complex that inhibits APC/C-mediated ubiquitination of  
77 securin and cyclin B and thereby delays sister chromatid separation and mitotic exit (De  
78 Antoni et al., 2005; Simonetta et al., 2009; Faesen et al., 2017). Compelling evidence indicate  
79 that the strength of the SAC response is dictated by the amount of Mad1-C-Mad2 present at  
80 kinetochores (Collin et al., 2013; Dick and Gerlich, 2013; Hustedt et al., 2014). However, a  
81 sustained SAC signalling also requires Mad1-C-Mad2 to associate with nuclear pore  
82 complexes (NPCs) during interphase, which is mediated through Mad1 binding to the nuclear  
83 basket nucleoporin Megator/Tpr (Scott et al., 2005; Lee et al., 2008; Souza et al., 2009;  
84 Lince-Faria et al., 2009; Schweizer et al., 2013; Rodriguez-Bravo et al., 2014). This  
85 arrangement regulates Mad1-C-Mad2 proteostasis to ensure that sufficient amount of  
86 complexes are produced before mitosis (Schweizer et al., 2013). Moreover, it was proposed  
87 that Mad1-C-Mad2 at NPCs also activates O-Mad2 into C-Mad2, hence providing a scaffold  
88 for the assembly of pre-mitotic MCC (Rodriguez-Bravo et al., 2014). This is thought to  
89 operate as a mitotic timer to support APC/C inhibition during early mitosis until newly  
90 formed kinetochores are able to instate efficient SAC activation (Sudakin et al., 2001;  
91 Meraldi et al., 2004; Malureanu et al., 2009; Maciejowski et al., 2010; Rodriguez-Bravo et  
92 al., 2014; Kim et al., 2018). Notwithstanding its importance for mitotic fidelity, how the  
93 subcellular redistribution of Mad1-C-Mad2 is coordinated with cell cycle progression  
94 remains elusive. Particularly, whether and how regulatory events at NPCs impact on Mad1-  
95 C-Mad2 kinetochore localization has not been established so far. We set out to address these  
96 questions in *Drosophila*, where the multi-sequential phosphorylation cascade controlling  
97 Mad1 kinetochore localization through the Mps1-Knl1-Bub1 pathway (London et al., 2012;  
98 Shepperd et al., 2012; Yamagishi et al., 2012; Primorac et al., 2013; London and Biggins,  
99 2014; Vleugel et al., 2015; Mora-Santos et al., 2016; Faesen et al., 2017; Ji et al., 2017; Qian  
100 et al., 2017; Zhang et al., 2017; Rodriguez-Rodriguez et al., 2018) is inherently absent  
101 (Schittenhelm et al., 2009; Conde et al., 2013). This reduces kinetochore-associated  
102 complexity, hence providing a simpler naturally occurring system to uncover the potential

103 role of kinetochore-extrinsic mechanisms in Mad1-C-Mad2 subcellular distribution  
104 throughout the cell-cycle and their significance for SAC signalling and genomic integrity *in*  
105 *vivo*.

106

## 107 **RESULTS AND DISCUSSION**

108

### 109 *Mps1 triggers Mad1 exclusion from nuclear pore complexes during prophase*

110 To investigate the events underlying the subcellular redistribution of Mad1 during mitotic  
111 entry we first monitored with high-temporal resolution the dynamics of Mad1 and Megator  
112 localization in *Drosophila* S2 cells (Figure 1A,B and S1A,B). Mad1-EGFP signal at the  
113 nuclear envelope (NE) begins to fade during early prophase whereas Megator-EGFP intensity  
114 persists until tubulin becomes detectable in the nucleus, an early event of nuclear envelope  
115 breakdown (NEB). Interestingly, depletion of Mps1 causes a significantly delay in Mad1-  
116 EGFP dissociation from the NE with no discernible impact on Megator-EGFP dynamics  
117 (Figure 1A,B and S1A,B). The decline in Mad1-EGFP signal intensity at the NE of Mps1-  
118 depleted cells entering mitosis overlaps perfectly with the pattern of Megator-EGFP, hinting  
119 that in the absence of Mps1 activity, the exclusion of Mad1 from NPCs is restrained by the  
120 presence of the nucleoporin (Figure S1A,B). These results support that Mad1 reallocation  
121 from NPCs is triggered before NEB onset in an Mps1-dependent manner. Consistently, a  
122 phospho-specific antibody recognizing the activating autophosphorylation (T490Ph) of Mps1  
123 T-loop (Jelluma et al., 2008; Moura et al., 2017) decorates the NE throughout prophase, thus  
124 indicating that Mps1 is active at NPCs during mitotic entry. We then tested whether inducing  
125 Mps1 activation in interphase cells prematurely displaces Mad1 from NPCs. As Mps1 is  
126 excluded from the nucleus until late G2/early prophase (Zhang et al., 2011; Jia et al., 2015),  
127 we promoted its nuclear import by fusing it with the SV40 large T-antigen nuclear  
128 localization signal (EGFP-Mps1<sup>WT</sup>-NLS). Strikingly, overexpression of EGFP-Mps1<sup>WT</sup>-NLS  
129 efficiently elicits nuclear activation of Mps1 (Figure S1C) and clearly decreases Mad1 levels  
130 at NPCs of interphase cells (Figure 1D,E). In contrast, Mad1 association with NPCs remains  
131 unaltered in interphase S2 cells overexpressing catalytic dead EGFP-Mps1<sup>KD</sup>-NLS or EGFP-  
132 Mps1<sup>WT</sup> (Figure 1D,E), which albeit active in the cytoplasm, fails to attain close proximity  
133 with the nucleoplasmic side of NPCs (Figure S1C). Collectively, these results demonstrate  
134 that timely control of Mps1 nuclear import and activation triggers Mad1 dissociation from  
135 NPCs during early prophase before NEB onset.

136

137 ***Mps1-mediated phosphorylation of Megator disrupts its interaction with Mad1***

138 Since Mad1 localization at NPCs is mediated by Megator (Scott et al., 2005; Lee et al., 2008;  
139 Souza et al., 2009; Lince-Faria et al., 2009; Schweizer et al., 2013; Rodriguez-Bravo et al.,  
140 2014) we next sought to examine whether Mps1 activity directly affects this interaction. We  
141 found that Megator preferentially co-immunoprecipitates with Mad1 when Mps1 is depleted  
142 from mitotically-enriched S2 cells lysates (Figure 2A). Moreover, knocking-down the kinase  
143 markedly reduced Megator hyperphosphorylation (Figure 2B), which prompt us to examine  
144 whether Megator is directly targeted by Mps1. *In vitro* kinase assays and mass-spectrometry  
145 analysis using recombinant Mps1 and fragments of Megator N-terminus potentially involved  
146 in Mad1 binding (Lee et al., 2008) revealed that GST-Mps1 phosphorylates MBP-  
147 Megator<sup>1178-1655</sup> on T1259, T1295, T1338 and T1390. These residues are located in a putative  
148 coiled-coil region (Figure 2D), which we found to directly interact with Mad1 N-terminus in  
149 pull-down assays (Figure 2E,F). Notably, 6xHis-Mad1<sup>1-493</sup> failed to bind with the same  
150 efficiency to MBP-Megator<sup>1178-1655/WT</sup> that had been previously phosphorylated by GST-  
151 Mps1 or to a phosphomimetic version where T1259, T1295, T1338 and T1390 are converted  
152 to aspartates (MBP-Megator<sup>1178-1655/T4D</sup>), thus indicating that phosphorylation of these  
153 particular residues negatively regulates Mad1 binding to Megator *in vitro* (Figure 2E,F). To  
154 monitor Mad1-Megator interaction in mitotic cells, we resorted to light-activated reversible  
155 inhibition by assembled trap (LARIAT). With this optogenetic tool, EGFP-tagged proteins  
156 are sequestered into complexes formed by a multimeric protein (MP) and a blue light-  
157 mediated heterodimerization Cib1-Cry2 module (Figure 2G,H). MP is fused to the  
158 cryptochrome-interacting basic helix-loop-helix 1 (Cib1), to which the cryptochrome Cry2 is  
159 able to bind when photoactivated (Kennedy et al., 2010; Lee et al., 2014; Osswald et al.,  
160 2019). By tagging Cry2 with an anti-GFP nanobody, we were able to induce clustering of  
161 wild-type (WT), phosphodeficient (T4A) and phosphomimetic (T4D) versions of EGFP-  
162 Megator<sup>1178-1655</sup> with high spatiotemporal resolution and examine their capacity to recruit  
163 Mad1 (Figure 2G,H). Immunofluorescence analysis reveals limited association of Mad1 with  
164 clusters of EGFP-Megator<sup>1178-1655/WT</sup> present in the cytoplasm of colchicine-treated S2 cells  
165 (Figure 2G,I). However, a significant increment in Mad1 recruitment to clustered EGFP-  
166 Megator<sup>1178-1655/WT</sup> occurs upon depletion of Mps1 and similar levels of Mad1 are observed at  
167 clusters of EGFP-Megator<sup>1178-1655/T4A</sup> (Figure 2G,I). Importantly, Mad1 fails to associate with  
168 clusters of EGFP-Megator<sup>1178-1655/T4D</sup>, even after Mps1 knock-down (Figure 2G,I).  
169 Collectively, these results demonstrate that Mps1-mediated phosphorylation of Megator on  
170 T1259, T1295, T1338 and T1390 prevents it from binding to Mad1 during mitosis.

171

172 ***Recruitment of Mad1 to unattached kinetochores requires its dissociation from Megator***

173 We then sought to examine the relevance of disengaging Mad1 from Megator in mitosis.  
174 With the LARIAT experiment we observed that Mad1 levels at EGFP-Megator<sup>1178-1655</sup>  
175 clusters and its accumulation at unattached kinetochores are inversely correlated (Figure 2G-  
176 J). This suggests that retaining Mad1 associated with Megator during mitosis precludes its  
177 proper recruitment to kinetochores. To address this further, we generated S2 cell lines stably  
178 expressing full length versions of Megator phosphomutants tagged with EGFP and depleted  
179 the endogenous nucleoporin with RNAi targeting the transcript UTRs (Figure 3A and 4A,B).  
180 Following an induction period of 24 hours, all transgenes are expressed at endogenous levels  
181 and localize correctly at the NE of interphase cells (Figure 3B; Figure 4A,B). Expression of  
182 Megator<sup>T4D</sup>-EGFP fails to rescue Mad1 loss from NPCs caused by depletion of the  
183 endogenous protein, further confirming that phosphorylation of T1259, T1395, T1338 and  
184 T1390 inhibits Megator interaction with Mad1 (Figure 3A-C). Conversely, Megator<sup>T4A</sup>-EGFP  
185 is able to restore Mad1 association with interphase NPCs (Figure 3A-C) but impairs its  
186 proper recruitment to unattached kinetochores. Expression of EGFP-Megator<sup>T4A</sup> in  
187 colchicine-treated cells results in a two-fold reduction of kinetochore-associated Mad1 levels  
188 when compared to Megator<sup>WT</sup>-EGFP cells (Figure 3D,E). An antibody that specifically  
189 recognizes the closed conformer of Mad2 (Fava et al., 2011) reveals a similar decrease in the  
190 amount of C-Mad2 at unattached kinetochores of EGFP-Megator<sup>T4A</sup> cells (Figure 4C,D). As  
191 expected, knocking-down Mps1 abrogates Mad1 and C-Mad2 kinetochore localization in  
192 cells expressing Megator<sup>WT</sup>-EGFP (both reduced to ~20% relative to control Megator<sup>WT</sup>-  
193 EGFP cells, Figure 3D,E and 4C,D). Strikingly, this is ameliorated by precluding Mad1  
194 interaction with Megator. Cells expressing Megator<sup>T4D</sup>-EGFP are still partially competent in  
195 recruiting Mad1, and to some extent, C-Mad2 to unattached kinetochores upon depletion of  
196 Mps1 kinase (~70% of Mad1 levels and ~50% of C-Mad2 levels relative to control  
197 Megator<sup>WT</sup>-EGFP cells, Figure 3D,E and 4C,D). Collectively, these results strongly suggest  
198 that kinetochore recruitment of a significant fraction (~50%) of Mad1-C-Mad2  
199 heterotetramers requires the dissociation of Mad1 from Megator driven by Mps1-mediated  
200 phosphorylation of the latter.

201

202 ***Dissociation of Mad1 from Megator in mitosis is required for functional SAC signalling***

203 To examine the importance of Mps1-mediated phosphorylation of Megator for SAC  
204 signalling, we monitored by live-cell imaging the mitotic progression of Megator

205 phosphomutants and assessed their capacity to arrest in mitosis when incubated with spindle  
206 poisons (Figure 3F). In asynchronous cultures, Megator<sup>T4A</sup>-EGFP cells progressed slightly  
207 faster from NEB to anaphase onset (~36 min) than cells expressing Megator<sup>WT</sup>-EGFP (~39  
208 min), suggesting that the SAC might be partially compromised in the phosphodeficient  
209 mutant. In line with SAC proficiency, cells expressing Megator<sup>WT</sup>-EGFP significantly  
210 delayed the transition to anaphase in the presence of colchicine (~640 min) or taxol (~180  
211 min). In contrast, Megator<sup>T4A</sup>-EGFP cells, although able to exhibit some mitotic delay in  
212 response to unattached kinetochores (~360 min in colchicine) or decreased microtubules  
213 dynamics (~87 min in taxol), failed to maintain this to the same time extent as Megator<sup>WT</sup>-  
214 EGFP cells (Figure 3F). These results indicate that preventing the phosphorylation of  
215 Megator on T1259, T1395, T1338 and T1390 results in a weakened SAC function, which  
216 correlates with the observed reduction (~50%) in Mad1 and C-Mad2 levels at unattached  
217 kinetochores. Thus, we reason that phosphorylation of this patch of threonine residues by  
218 Mps1 kinase is required to release Mad1 from Megator to provide the kinetochore with  
219 sufficient amount of Mad1-C-Mad2 template that ensures a robust SAC response.

220

### 221 ***Constitutive phosphorylation of Megator reduces C-Mad2 levels at kinetochores and*** 222 ***compromises SAC strength***

223 Mad1 and Mad2 form a highly stable complex *in vitro* (Sironi et al., 2002; De Antoni et al.,  
224 2005; Vink et al., 2006) and interact with each other throughout the cell cycle (Chen et al.,  
225 1998; Chung and Chen, 2002; Fava et al., 2011; Schweizer et al., 2013). Interestingly,  
226 although Megator<sup>T4D</sup>-EGFP cells can recruit Mad1 to unattached kinetochores, we observe an  
227 evident decline in the accumulation of C-Mad2 compared to cells expressing Megator<sup>WT</sup>-  
228 EGFP (Figure 4C,D). This phenotype is highly reminiscent of that observed in cells depleted  
229 of Megator (Figure 4F,G and S2D-F), which in mammals has been attributed to increased  
230 proteolytic degradation of Mad1 and Mad2 (Schweizer et al., 2013). Although we confirm in  
231 *Drosophila* cells a significant reduction in the total levels of Mad1 and Mad2 following  
232 Megator depletion (Figure 4A,B and S2D), these are partially rescued to a similar extent  
233 regardless the Megator-EGFP transgene expressed (Figure 4A,B). This argues against altered  
234 Mad1 and Mad2 proteostasis as the main underlying cause for deficient C-Mad2  
235 accumulation at kinetochore of Megator<sup>T4D</sup>-EGFP cells. Instead, we envisage that  
236 Megator/Tpr might function *in vivo* as a scaffold for the assembly of the Mad1-C-Mad2  
237 complex before its targeting to kinetochores. Kinetochore loading of C-Mad2 is therefore  
238 expected to occur inefficiently if Mad1 fails to bind Megator, as in interphase cells where the



239 endogenous nucleoporin is depleted or replaced by the phosphomimetic version of the  
240 protein. In line with limited C-Mad2 at kinetochores, cells expressing Megator<sup>T4D</sup>-EGFP  
241 failed to arrest in mitosis in response to colchicine as efficiently as Megator<sup>WT</sup>-EGFP cells  
242 (Figure 4E). This is indicative of a weakened SAC function, which is also observed in  
243 parental S2 cells and human cultured cells respectively depleted of Megator (Figure 4H and  
244 S2G) or Tpr (Schweizer et al., 2013; Rodriguez-Bravo et al., 2014). Hence, while Mad1  
245 dissociation from Megator triggered during mitotic entry efficiently endorses Mad1-C-Mad2  
246 to unattached kinetochores, abrogating Mad1-Megator interaction during interphase is  
247 detrimental for SAC signalling as it possibly compromises the assembly of Mad1-C-Mad2  
248 heterotetramers (Schweizer et al., 2013) and the formation of pre-mitotic MCC (Rodriguez-  
249 Bravo et al., 2014).

250

251 ***Precluding Mad1 from binding to Megator rescues chromosome mis-segregation and***  
252 ***aneuploidy in neuroblasts and intestinal stem cells depleted of Mps1***

253 The results so far demonstrate that Mps1 controls Mad1 kinetochore recruitment in part by  
254 abolishing its interaction with Megator. We next assessed whether this mechanism occurs *in*  
255 *vivo* and its relevance for genomic stability. We prevented Mps1 kinetochore localization in  
256 *Drosophila* 3<sup>rd</sup> instar larval neuroblasts and examined their capacity to recruit Mad1 to  
257 unattached kinetochores. For that, we resorted to *mps1*-null mutant flies (*ald*<sup>G4422</sup>) expressing  
258 a truncated version of Mps1 that lacks the N-terminus domain (gEGFP-Mps1-C<sup>term</sup>) required  
259 for kinetochore targeting (Althoff et al., 2012; Conde et al., 2013). As expected, Mad1  
260 inability to localize at kinetochores of colchicine-treated *ald*<sup>G4422</sup> neuroblasts was largely  
261 rescued by the expression of gEGFP-Mps1-WT (Figure S2A-C). Importantly, neuroblasts  
262 expressing the gEGFP-Mps1-C<sup>term</sup> transgene under control of *mps1* promoter were still able  
263 to partially recruit Mad1 to unattached kinetochores, accumulating up to 50% of the levels  
264 detected in control *w*<sup>1118</sup> flies (Figure S2A-C). This confirms *in vivo* a kinetochore-extrinsic  
265 role for Mps1 in Mad1 kinetochore localization.

266 Collectively, our results indicate that non-kinetochore Mps1 abolishes the interaction  
267 between Megator and Mad1 in mitosis, which would otherwise preclude efficient recruitment  
268 of Mad1-C-Mad2 to unattached kinetochores. This rationale is further supported *in vivo* by  
269 the observation that RNAi-mediated repression of Megator extensively restores Mad1  
270 kinetochore recruitment in a *ald*<sup>G4422</sup> genetic background (Figure 5A,B). Importantly, this  
271 concomitantly rescues the aneuploidy that is caused by loss of Mps1 activity (Figure 5A).  
272 Depletion of Megator from *ald*<sup>G4422</sup> neuroblasts led to a striking decrease in the frequency of



273 mitotic figures exhibiting aneuploid karyotypes (~70% in *ald*<sup>G4422</sup> vs ~30% in  
274 *ald*<sup>G4422</sup>+Megator RNAi; Figure 5A). Given the evident recovery in genomic stability, we  
275 hypothesized that depletion of Megator improves the fidelity of chromosome segregation in  
276 cells devoid of Mps1 activity. To test this, we monitored by live imaging the mitotic  
277 progression of unperturbed (no drugs) larval neuroblasts (Figure 5C-E). Consistent with  
278 Mps1 and Megator roles in SAC signalling, neuroblasts depleted of either protein progressed  
279 faster through mitosis (~5 min), when compared to *w*<sup>1118</sup> controls (~7.3 min). Interestingly,  
280 although *UAS-MegatorRNAi* and *ald*<sup>G4422</sup> neuroblasts reveal indistinguishable mitotic  
281 timings, the frequency of anaphases with lagging chromosomes is dramatically higher in  
282 *mps1*-null mutants (Figure 5C-E). Importantly, depletion of Megator significantly restores the  
283 accuracy of segregation in *ald*<sup>G4422</sup> neuroblasts, albeit failing to extend the time from NEB to  
284 anaphase onset (Figure 5C-E). A similar defect in SAC function was observed in cultured S2  
285 cells co-depleted of Mps1 and Megator. Although proficient in Mad1 kinetochore recruitment  
286 (Figure S2E,F), these cells failed to arrest in mitosis when challenged with colchicine (Figure  
287 S2G), as would be expected from compromised Mps1-dependent phosphorylation of Mad1,  
288 and consequently, from limited C-Mad2-Cdc20 interaction (Faesen et al., 2017; Ji et al.,  
289 2017). Hence, in *Drosophila* neuroblasts undergoing unperturbed mitosis, kinetochore-  
290 associated Mad1 is able to efficiently safeguard anaphase fidelity and chromosomal euploidy  
291 independently of its SAC function. This is in line with previous studies reporting a role for  
292 Mad1 in preventing merotely through pathways that are uncoupled from its interaction with  
293 Mad2 and SAC signalling (Emre et al., 2011; Akera et al., 2015). We then tested whether a  
294 similar improvement in genomic stability also occurs in adult tissues. We have recently  
295 shown that inducing aneuploidy in intestinal stem cells (ISCs) through depletion of Mps1  
296 results in severe intestinal dysplasia (Resende et al., 2018, Figure S3A). Here, we confirmed  
297 an increased proliferation of ISCs and enteroblasts (EBs) following *EsgGAL4*-driven  
298 expression of *UAS-Mps1RNAi* (Figure S3B,C). Importantly, we found that co-expression of  
299 *UAS-MegatorRNAi* suppresses this dysplastic phenotype, thus suggesting a rescue in the levels  
300 of aneuploidy in ISCs as observed for larval neuroblasts. Collectively, these results strongly  
301 support that Mad1 dissociation from its nuclear pore receptor represents a critical event for  
302 efficient kinetochore localization, for the fidelity of chromosome segregation and  
303 consequently, for genome stability *in vivo*.

304

305 Our biochemical, cellular and *in vivo* data concur to demonstrate that Mps1 activity at NPCs  
306 early in prophase sets the stage to enable appropriate recruitment of Mad1 by

307 unattached/prometaphase kinetochores (Figure 5F). Phosphorylation of Megator by Mps1  
308 abrogates the nucleoporin interaction with Mad1, which we find to be essential for  
309 kinetochore localization of Mad1-C-Mad2 to levels required to sustain robust SAC signalling  
310 and accurate chromosome segregation. We also show that dissociation of Mad1 from NPCs is  
311 prevented during interphase by nuclear exclusion of Mps1 and decreased phosphorylation of  
312 its activating T-loop. This is most likely important to facilitate Mad1-C-Mad2 interaction and  
313 the assembly of MCC prior to kinetochore maturation and SAC activation (Rodriguez-Bravo  
314 et al., 2014; Kim et al., 2018). Together, these observations establish that a key function of  
315 non-kinetochore Mps1 is to coordinate Mad1 subcellular localization with cell cycle  
316 progression, so that both nuclear pores in interphase and kinetochores in mitosis generate  
317 anaphase inhibitors that preserve genomic stability (Figure S4).

318

## 319 **MATERIALS AND METHODS**

### 320 **S2 cell cultures, RNAi-mediated depletion and drug treatments**

321 The *Drosophila* S2-DGRC cell line (#stock6) was acquired from the Drosophila Genomics  
322 Resource Center, Indiana University and was not independently authenticated. The cell lines  
323 were routinely tested negative for mycoplasma contamination. Cell cultures, RNAi synthesis  
324 and RNAi treatment were performed as previously described (Conde et al., 2013). At  
325 selected time points, cells were collected and processed for immunofluorescence, time-lapse  
326 microscopy, immunoblotting or immunoprecipitation. When required, cells were subjected  
327 to several drug treatments before being collected and processed for the desired analysis. To  
328 promote microtubule depolymerisation, cells were incubated with 30  $\mu$ M colchicine (Sigma-  
329 Aldrich, St. Louis, MO) for 30 minutes - 24 hours. To decrease microtubule dynamics cells  
330 were incubated with 100 nM taxol (Sigma-Aldrich). When required, 20 $\mu$ M MG132  
331 (Calbiochem, San Diego, CA) were added to inhibit the proteasome. For experiments in  
332 Figure 1D,E and Figure S1C, cells were incubated with 10 $\mu$ M of Leptomycine B (Sigma-  
333 Aldrich) for 3 hours to block Crm1-mediated nuclear export.

334

### 335 **Constructs and S2 cells transfection**

336 Recombinant plasmids pHWG[blast]-Megator<sup>WT</sup>, pHWG[blast]-Megator<sup>T4A</sup>, pHWG[blast]-  
337 Megator<sup>T4D</sup>, pHGW[blast]-Megator<sup>1187-1655/WT</sup>, pHGW[blast]-Megator<sup>1187-1655/T4A</sup>,  
338 pHGW[blast]-Megator<sup>1187-1655/T4D</sup> and pHGW[blast]-Mps1<sup>WT</sup> were generated using the  
339 Gateway Cloning System (Invitrogen). Megator, Megator<sup>1187-1655</sup> or Mps1 cDNAs were  
340 amplified by PCR and inserted into modified versions of pENTR-entry vector through

341 FastCloning (Li et al., 2011). To generate pENTR-Megator<sup>1187-1655/T4A</sup> and pENTR-  
342 Megator<sup>1187-1655/T4D</sup> codons corresponding to T1259, T1302, T1338 and T1390 of pENTR-  
343 Megator<sup>1187-1655</sup> were converted either to codons for alanine (A) or aspartate (D) respectively,  
344 by several cycles of site-directed mutagenesis with primers harbouring the desired mutations.  
345 To generate pENTR-Megator<sup>T4A</sup> and pENTR-Megator<sup>T4D</sup>, the fragment corresponding to  
346 amino acids 1187-1655 on pENTR-Megator<sup>WT</sup> was replaced by Megator<sup>1187-1655/T4A</sup> or  
347 Megator<sup>1187-1655/T4D</sup> PCR products, respectively through FastCloning (Li et al., 2011). PCR  
348 reactions were performed using Phusion polymerase (New England Biolabs). PCR products  
349 were digested with DpnI restriction enzyme (New England Biolabs), used to transform  
350 competent bacteria and selected for positives. Subsequently, pENTR-Megator<sup>1187-1655</sup>  
351 constructs and pENTR-Mps1 were recombined with pHGW[blast] (blasticidin<sup>R</sup>; N-terminal  
352 EGFP tag), and pENTR-Megator constructs with pHWG (blasticidin<sup>R</sup>; C-terminal EGFP tag)  
353 using Gateway LR Clonase II (Invitrogen), according to the manufacturer's instructions.  
354 pHGW-Mps1<sup>WT</sup>-NLS was produced by PCR amplification of pHGW-Mps1<sup>WT</sup> with primers  
355 harbouring SV40 large T-antigen nuclear localization signal sequence. pHGW-Mps1<sup>KD</sup>-NLS  
356 was produced by site-directed mutagenesis of pHGW-Mps1<sup>WT</sup>-NLS with primers harbouring  
357 the mutation to convert D478 to A478. PCR reactions were performed with Phusion  
358 polymerase, followed by digestion with DpnI restriction enzyme (New England Biolabs). The  
359 constructs H2B-mCherry, H2B-GFP, mCherry- $\alpha$ -Tubulin, Mad1-EGFP, pHW-CIB-MP-  
360 HRW-CRY2-V<sub>H</sub>H, and pHGW-aPKC have been previously described (Conde et al., 2013;  
361 Moura et al., 2017; Osswald et al., 2019). Plasmids were transfected into S2 cells using  
362 Effectene Transfection Reagent (Qiagen), according to the manufacturer's instructions.  
363 Transiently expressing cells were harvested 4-5 days after transfections. Stable cell lines were  
364 obtained by selection in medium with 25  $\mu$ g/mL blasticidin. To induce expression of pHW-  
365 CIB-MP-HRW-CRY2-V<sub>H</sub>H, pHGW[blast] or pHWG[blast] constructs cells were incubated  
366 for 30min at 37°C 24 hours prior to processing. Cells transfected with pHW-CIB-MP-HRW-  
367 CRY2-V<sub>H</sub>H were maintained in the dark until processing.

368

### 369 **Live cell imaging**

370 Live analysis of mitosis was performed in S2 cell lines and neuroblasts expressing the  
371 indicated constructs. S2 cells were plated on glass bottom dishes (MatTek) coated with  
372 Concanavalin A (0.25 mg/mL; Sigma-Aldrich). Third-instar larvae brains were dissected in  
373 PBS and mounted in PBS between coverslips of different sizes. The preparation was  
374 squashed and sealed with Halocarbon oil 700 (Sigma-Aldrich). 4D datasets were collected at

375 25°C with a spinning disc confocal system (Revolution; Andor) equipped with an electron  
376 multiplying charge-coupled device camera (iXonEM+; Andor) and a CSU-22 unit  
377 (Yokogawa) based on an inverted microscope (IX81; Olympus). Two laser lines (488 and  
378 561 nm) were used for near-simultaneous excitation of EGFP and mCherry or RFP. The  
379 system was driven by iQ software (Andor). Time-lapse imaging of z stacks with 0.8 µm steps  
380 for S2 cells and 0.5µm for neuroblasts were collected and image sequence analysis, video  
381 assembly and fluorescence intensities quantification performed using ImageJ software.  
382 Quantification of Mad1-EGFP and Megator-EGFP levels at the nuclear envelope and  
383 mCherry tubulin at the nucleus was performed on single Z stacks from images acquired with  
384 fixed exposure settings. Mad1-EGFP and Megator-EGFP intensities at the nuclear envelope  
385 were determined for each time point (t), using the following formula:

386

$$\frac{(Bi - bm \times Ba) - (Si - bm \times Sa)}{(Ba - Sa)} \times \frac{Cit}{Cit0}$$

387

388 Bi -integrated density of a ROI harbouring the nucleus (including outer nuclear membrane);  
389 Ba – area of the ROI harbouring the nucleus; Si – integrated density of a ROI encompassing  
390 the nucleoplasm; Sa - area of the ROI harbouring the nucleoplasm; bm- mean intensity a ROI  
391 outside the cell (background); Cit - integrated density of a ROI harbouring the cell at time t;  
392 Cit0- integrated density of a ROI harbouring the cell on the first frame. mCherry-Tubulin  
393 intensities in the nucleus were determined for each time point (t), using the following  
394 formula:

$$(Nm - bm) \times \frac{Cit}{Cit0}$$

395 Nm- mean intensity of a ROI inside the nucleus, bm- mean intensity of the background, Cit-  
396 integrated density of a ROI harbouring the cell at time t; Cit0- integrated density of a ROI  
397 harbouring the cell on the first frame. The changes in fluorescence intensity over time were  
398 plotted as normalized signal relative to the mean signal measured before NEB.

399

#### 400 **Immunofluorescence analysis**

401 For immunofluorescence analysis of S2 cells, 10<sup>5</sup> cells were centrifuged onto slides for 5 min,  
402 at 1500 rpm (Cytospin 2, Shandon). For LARIAT experiments, cells were irradiated with  
403 blue light for 30 min prior to centrifugation. Afterwards, cells were fixed in 4%  
404 paraformaldehyde in PBS for 12min and further extracted for 8min with 0.1% Triton X-100

405 in PBS. Alternatively, cells were simultaneously fixed and extracted in 3.7% formaldehyde  
406 (Sigma), 0.5 % Triton X-100 in PBS for 10min followed by three washing steps of 5 min  
407 with PBS-T (PBS with 0,05% Tween20). For immunofluorescence analysis of *Drosophila*  
408 neuroblasts, third-instar larval brains were dissected in PBS and incubated with 50 $\mu$ M  
409 colchicine for 1.5h. The brains were after fixed in 1.8% formaldehyde (Sigma-Aldrich) and  
410 45% glacial acetic acid for 5min, squashed between slide and coverslip and immersed in  
411 liquid nitrogen. Subsequently, coverslips were removed, the slides were incubated in cold  
412 ethanol for 10 min and washed in PBS with 0.1% Triton X-100. Immunostaining was  
413 performed as previously described (Moura et al., 2017). Fixation and immunostaining of  
414 intestines from 20 day adult flies were performed as previously described (Resende et al.,  
415 2018). Images were collected in a Zeiss Axio Imager microscope (Carl Zeiss, Germany) or in  
416 a Leica TCS II scanning confocal microscope (Leica Microsystems). For  
417 immunofluorescence quantification, the mean pixel intensity was obtained from raw images  
418 acquired with fixed exposure acquisition settings. Fluorescence intensities at the nuclear  
419 envelope were obtained from single Z stack projections. The nuclear envelope was defined  
420 based on Megator or Megator-EGFP staining, by subtracting a ROI containing the  
421 nucleoplasm to a ROI harboring the entire nucleus (outer membrane) after subtraction of  
422 background intensities estimated from regions outside the cell. Mad1 fluorescence intensities  
423 were determined relative to Megator or Megator-EGFP. Fluorescence intensities of LARIAT-  
424 mediated clustered proteins and kinetochore proteins were obtained from maximum projected  
425 images. For Mad1 and EGFP-Megator<sup>1187-1655</sup>, the fluorescence intensities were quantified for  
426 individual clusters selected manually by mRFP-Cry2 staining. After subtraction of  
427 background intensities estimated from regions inside of the cell with no clusters, the intensity  
428 of Mad1 was determined relative to Megator-EGFP signal. For kinetochore proteins the  
429 fluorescence intensity was quantified for individual kinetochores selected manually by Mad1,  
430 CID or Spc105 staining. The size of the ROI was predefined so that each single kinetochore  
431 could fit into. After subtraction of background intensities, estimated from regions outside the  
432 cell, the intensity of the proteins was determined relative to cytoplasmic Mad1, CID or  
433 Spc105.

434

### 435 **S2 cell lysates, immunoprecipitation, and western blotting**

436 For *Drosophila* brain lysates, at least 10 third-instar larvae brains were dissected in PBS,  
437 transferred to Laemmli Buffer (4% SDS, 10%  $\beta$ -mercaptoetanol, 0.125M Tris-HCl, 20%

438 glycerol and 0.004% bromophenol blue) and boiled at 95°C for 5min. S2 cell lysates for  
439 immunoprecipitation and western blot analysis were obtained from non-transfected S2 cells  
440 or S2 cells expressing Megator-EGFP transgenes treated with colchicine and MG132 when  
441 indicated. For western blot of total S2 cell lysates, 10<sup>6</sup> cells were harvested through  
442 centrifugation at 5000rpm for 10min. The resulting pellet was resuspended in Laemmli  
443 sample buffer and boiled at 95°C for 5min.

444 For immunoprecipitation assays, cells were harvested through centrifugation at 5000 rpm for  
445 10 min at 4°C and afterwards washed with 2mL PBS supplemented with 1x protease  
446 inhibitors cocktail (Roche, Basel, Switzerland). Cell pellet was resuspended in lysis buffer  
447 (150 mM KCl, 75 mM HEPES, pH 7.5, 1.5 mM EGTA, 1.5 mM MgCl<sub>2</sub>, 15% glycerol, 0.1%  
448 NP-40, 1x protease inhibitors cocktail (Roche) and 1x phosphatase inhibitors cocktail 3  
449 (Sigma)) before freezing disruption in liquid nitrogen. Cell lysates were then clarified  
450 through centrifugation at 10000 rpm for 10 min at 4°C and concentration determined  
451 measuring Absorbance at 280nm in the Nanodrop 1000 (ThermoFisher). Lysates containing  
452 800µg of protein in a total of 400µl lysis buffer were pre-cleared by incubation with 15µl of  
453 Protein A magnetic beads (New England Biolabs) for 1h at 4°C under agitation. Pre-cleared  
454 extracts were incubated with rabbit anti-Mad1 (1:100) overnight, at 4°C under agitation.  
455 Afterwards, the mixture was incubated with 40µl of Protein A magnetic beads for 1h30 min,  
456 at 4°C with agitation. Magnetic beads were collected and washed 4 times with 500µL of lysis  
457 buffer. Magnetic beads were resuspended Laemmli sample buffer and boiled at 95°C for 5  
458 min. To confirm protein hyperphosphorylation status, 50µg of mitotic cell lysates were  
459 treated with 400U of λ-phosphatase (New England Biolabs) at 30°C for 1 hour in a total  
460 volume of 50µl PMP phosphatase buffer (50 mM HEPES pH 7.5, 100 mM NaCl, 2 mM  
461 DTT, 0.01% Brij 35, 1 mM MnCl<sub>2</sub>; New England Biolabs).

462 Samples were resolved by SDS-PAGE and transferred to a nitrocellulose membrane, using  
463 the iBlot Dry Blotting System (Invitrogen) according to the manufacturer's instructions.  
464 Transferred proteins were confirmed by Ponceau staining (0.25% Ponceau S in 40%  
465 methanol and 15% acetic acid). The membrane was blocked for 1 hour at room temperature  
466 with 5% powder milk prepared in PBST and subsequently incubated with primary antibodies  
467 diluted in blocking solution overnight at 4°C under agitation. Membranes were washed three  
468 times for 10min with PSBT and incubated with secondary antibodies (diluted in blocking  
469 solution) for 1 hour at room temperature with agitation. Secondary antibodies conjugated to  
470 Horseradish peroxidase (Santa Cruz Biotechnology) or VeriBlot for IP Detection Reagent  
471 (HRP) (Abcam, ab131366) were used according to the manufacturer's instructions. Blots



472 were developed with ECL Chemiluminescent Detection System (Amersham) according to  
473 manufacturer's protocol and detected on X-ray film (Fuji Medical X-Ray Film). When  
474 required proteins were resolved in 4-20% Mini-PROTEAN® TGX Precast Gel (BioRad) and  
475 transferred to nitrocellulose membrane overnight in 48mM Tris, 39mM glycine, 0.037%  
476 SDS, 20% metanol, pH=8.3, at 20V, 4°C.

477

#### 478 **Production and purification of recombinant proteins**

479 To generate 6xHis-Mad1<sup>1-493</sup> and 6xHis-BubR1<sup>1-358</sup> constructs for expression in bacteria,  
480 PCR products with the coding sequence were cloned into NdeI/XhoI or Sall/XhoI sites of  
481 pET30a (+) vector (Novagen, Darmstadt, Germany), respectively. TOP10 competent cells  
482 were transformed and selected for positives. The recombinant construct was used to  
483 transform BL21-star competent cells and protein expression induced with 0.05mM IPTG at  
484 15°C, overnight. Cells were harvested and lysed in bacterial lysis buffer (50mM NaH<sub>2</sub>PO<sub>4</sub>,  
485 300mM NaCl, 10mM imidazole, pH=8.0) supplemented with 1mM PMSF (Sigma),  
486 0.4mg/ml Lysozyme (Sigma), sonicated and clarified by centrifugation at 4°C. Recombinant  
487 6xHis-Mad1<sup>1-493</sup>, 6xHis-BubR1<sup>1-358</sup> were purified with Novex Dynabeads (Invitrogen) in  
488 bacterial lysis buffer.

489 To generate recombinant MBP-Megator fragments (a.a. 1-402; 403-800; 1187-1655), PCR  
490 products harboring the coding sequences for fragments 1-402, 403-800 and 1187-1655 of  
491 Megator were cloned into pMal-c2 (New England Biolabs) vector. Megator<sup>1187-1655/T4A</sup> and  
492 Megator<sup>1187-1655/T4D</sup> were inserted into pMal-c2 vector through FastCloning (Li et al., 2011)  
493 using Phusion Polymerase (New England Biolabs). These constructs were used to transform  
494 TOP10 competent bacteria and cells were selected for the incorporation of plasmids. The  
495 selected recombinant constructs were used to transform BL21-star competent cells and  
496 protein expression induced with 0.05 mM IPTG at 15°C, overnight. Pellets of these cultures  
497 were lysed in column buffer (200 mM NaCl, 20 mM Tris-HCl, 1 mM EDTA, 1mM DTT,  
498 pH=7.4) supplemented with 1% Triton X100 (Sigma), 1mM PMSF (Sigma), and 0.4 mg/ml  
499 of lysozyme (Sigma), sonicated and clarified by centrifugation at 4°C. Recombinant MBP-  
500 Megator fragments were purified with amylose magnetic beads (New England Biolabs) and  
501 eluted in Column Buffer supplemented with 10mM Maltose. The purified recombinant  
502 proteins (eluted or bound to magnetic beads) were resolved by SDS-PAGE and their relative  
503 amounts determined after Coomassie blue staining. Similar amounts of protein were used in  
504 the subsequent assays.

505



506 ***In vitro* kinase assays, mass spectrometry analysis and pull-down assays**

507 For *in vitro* kinase assays, recombinant fragments of MBP-Megator were incubated with  
508 0.05 $\mu$ g HsMps1/TTK (SignalChem, Richmond, Canada) in a total volume of 30 $\mu$ l kinase  
509 reaction buffer (5 mM MOPS pH 7.2, 2.5 mM  $\beta$ -glycerol-phosphate, 5 mM MgCl<sub>2</sub>, 1 mM  
510 EGTA, 0.4 mM EDTA, 0.25 mM DTT, 100  $\mu$ M ATP and supplemented with 1 $\times$  phosphatase  
511 inhibitors cocktail 3 (Roche). Reactions were carried out at 30°C for 30 min, and analysed by  
512 autoradiography, subjected to mass spectrometry analysis or used in pull-down assays. For  
513 detection of <sup>32</sup>P incorporation, the kinase reaction buffer was supplemented with 10  $\mu$  Ci [  $\gamma$  -  
514 <sup>32</sup>P] ATP [3000Ci/mmol, 10mCi/mL] and the reaction was stopped by addition of Laemmli  
515 sample buffer, boiled for 5min at 95°C and resolved by SDS-PAGE. After drying at 80°C  
516 under vacuum, the gel was exposed to X-ray films (Fuji Medical X-Ray Film). For  
517 identification of phosphorylated residues, the reaction was stopped by addition of 6M Urea  
518 and subsequently analyzed by liquid chromatography coupled with mass spectrometry.  
519 Samples were digested with LysC/Trypsin and/or GluC and prepared for LC-MS/MS analysis  
520 as previously described (Rappsilber et al., 2007). Peptides (100ng) were separated on a  
521 Thermo Scientific™ EASY-nLC 1000 HPLC system (Thermo Fisher Scientific™) for  
522 1hour from 5-60% acetonitrile with 0.1% formic acid and directly sprayed via a nano-  
523 electrospray source in a quadrupole Orbitrap mass spectrometer (Q Exactive™, Thermo  
524 Fisher Scientific™) (Michalski et al., 2011). The Q Exactive™ was operated in data-  
525 dependent mode acquiring one survey scan and subsequently ten MS/MS scans (Olsen et al.,  
526 2007). Resulting raw files were processed with the MaxQuant software (version 1.5.2.18)  
527 using a reduced database containing only the proteins of interest and giving phosphorylation  
528 on serine, threonine and tyrosine as variable modification (Cox and Mann, 2008). A false  
529 discovery rate cut off of 1% was applied at the peptide and protein levels and the  
530 phosphorylation site decoy fraction.

531 For pull-down assays, 6xHis-Mad1<sup>1-493</sup> or 6xHis-BubR1<sup>1-358</sup> bound to Novex Dynabeads  
532 (Invitrogen) were incubated with the MPB-Megator<sup>1187-1655</sup> constructs in a final volume of  
533 50 $\mu$ L column buffer (250 mM NaCl, 20 mM Tris-HCl pH 7.4, 1 mM EDTA, 1 mM DTT,  
534 0.05% Tween20 (Sigma) 1x protease inhibitors cocktail (Roche) and 1x phosphatase  
535 inhibitors cocktail 3 (Sigma-Aldrich) for 1h30min at room temperature with agitation. The  
536 magnetic beads (with bound protein) were collected and washed 3 times with 500 $\mu$ L column  
537 buffer, resuspended in Laemmli sample buffer and boiled at 95°C for 5 min. After removal of

538 the magnetic beads, samples were resolved by SDS-PAGE and probed for proteins of interest  
539 through western blotting.

540

#### 541 **Antibodies**

542 The following primary antibodies were used for immunofluorescence studies: rat anti-CID  
543 (Rat4) used at 1:250, rabbit anti-phosphorylated Thr676-Mps1 (T676) (a gift from Geert  
544 Kops, (Jelluma et al., 2008) used at 1:2000, chicken anti-GFP (Abcam, ab 13970) used at  
545 1:2000 for S2 cells and 1:1000 in neuroblasts, mouse anti-Megator (gift from Jørgen  
546 Johansen and Kristen Johansen, Qi et al., 2004, RRID:AB\_2721935), used at 1:20, rabbit  
547 anti-Mad1 (Rb1, Conde et al., 2013) used at 1:2500 for S2 cells and 1:1000 for neuroblasts,  
548 mouse anti-C-Mad2 (Sigma), used at 1:50 for S2 cells and 1:25 for neuroblasts, rat anti-  
549 Spc105 used at 1:250, guinea pig anti-Mps1 (Gp15) (a gift from Scott Hawley,  
550 RRID:AB\_2567774) used at 1:250, rabbit anti-phosphorylated ser10-Histone H3 (p-H3)  
551 (Milipore, Billerica, MA, RRID:AB\_565299) used at 1:5000, rabbit anti-GFP (Molecular  
552 Probes) used at 1:5000 for *Drosophila* intestines. The following primary antibodies were  
553 used for western blotting studies: mouse anti- $\alpha$ -tubulin DM1A (Sigma-Aldrich,  
554 RRID:AB\_477593) used at 1:10000; rabbit anti-Cyclin B (gift from C. Lehner) used at  
555 1:10000, guinea pig anti-Mps1 (Gp15) (a gift from Scott Hawley, RRID:AB\_2567774) used  
556 at 1:5000; mouse anti-Megator (gift from Jørgen Johansen and Kristen Johansen, Qi et al.,  
557 2004, RRID:AB\_2721935) used at 1:100, rabbit anti-Mad1 (Rb1,(Conde et al., 2013) used at  
558 1:2000, rabbit anti-Mad2 (Rb 1223) used at 1:100, mouse anti-MBP (New England  
559 Biolabs, RRID:AB\_1559738), used at 1:5000; mouse anti His Tag (Milipore, 05-949) used  
560 at 1:2500.

561

#### 562 **Fly stocks**

563 All fly stocks were obtained from Bloomington Stock Center (Indiana, USA), unless stated  
564 otherwise. The mps1 mutant allele *ald*<sup>G4422</sup> has been described before (Conde et al., 2013).  
565 *Insc-GAL4* was used to drive the expression of *UAS-MegatorRNAi* and *UAS-Mad1RNAi* in  
566 neuroblasts from third-instar larvae brains. *EsgGAL4* was used to drive expression of *UAS-*  
567 *MegatorRNAi* and *UAS-Mps1RNAi* in ISCs and EBs from intestines of adult flies, as  
568 previously described (Resende et al., 2018). *w*<sup>1118</sup> was used as wild-type control. Fly stocks  
569 harboring gEGFP-MPS1<sup>WT</sup> and gEGFP-MPS1<sup>325-630</sup> under control of Mps1 cis-regulatory  
570 region were kindly provided by Christian Lehner (Althoff et al., 2012).

571

572 **Statistical analysis**

573 All statistical analysis was performed with GraphPad Prism V7.0f (Graph- Pad Software,  
574 Inc.).

575

576 **ACKNOWLEDGEMENTS**

577 We thank Geert Kops (Hubrecht Institute, The Netherlands) for the phospho-specific Mps1  
578 antibody, Thomas Maresca (University of Massachusetts Amherst, USA) for the Mad1-EGFP  
579 construct, Christian Lehner (University of Zurich, Switzerland) for the gEGFP-Mps1-WT  
580 and gEGFP-Mps1-C<sup>term</sup> fly stocks, Eurico Morais-de-Sá (i3S/IBMC, Portugal) for sharing  
581 unpublished LARIAT constructs, Helder Maiato (i3S/IBMC, Portugal) for the Megator  
582 cDNA and Jørgen Johansen and Kristen Johansen (Iowa State University, USA) for the  
583 Megator antibody. We thank Ana Pinto, Nelson Leça and Margarida Moura (i3S/IBMC,  
584 Portugal) for technical help and critical reading of the manuscript.

585 This article is a result of the project Norte-01-0145-FEDER-000029 - Advancing Cancer  
586 Research: From basic knowledge to application, supported by Norte Portugal Regional  
587 Operational Programme (NORTE 2020), under the PORTUGAL 2020 Partnership  
588 Agreement, through the European Regional Development Fund (FEDER). MO is supported  
589 by a fellowship from the GABBA PhD program from the University of Porto,  
590 PD/BD/105746/2014. SC-S is supported by the FCT PhD fellowship  
591 SFRH/BD/136527/2018). JB is supported by an FCT PhD grant SFRH/BD/87871/2012. CC  
592 is supported by an FCT investigator position and funding (IF/01755/2014).

593

594 The authors declare no competing financial interests

595

596 **AUTHOR CONTRIBUTIONS**

597 Mariana Osswald and Sofia Cunha-Silva performed most of the experiments with  
598 contributions from Jana Goemann, Luis M Santos and Carlos Conde. João Barbosa  
599 performed the live-imaging experiments with *Drosophila* neuroblasts. Pedro Resende  
600 performed the immunofluorescence analysis of *Drosophila* intestines. Tanja Bange  
601 performed the mass-spectrometry analysis of *in vitro* kinase assays. Mariana Osswald, Sofia  
602 Cunha-Silva, Claudio E Sunkel and Carlos Conde analysed the data. Mariana Osswald and  
603 Carlos Conde conceived the project. Carlos Conde designed the experiments, wrote the  
604 manuscript and coordinated the project.

605

606 **References:**

- 607 Akera, T., Y. Goto, M. Sato, M. Yamamoto, and Y. Watanabe. 2015. Mad1 promotes  
608 chromosome congression by anchoring a kinesin motor to the kinetochore. *Nat. Cell*  
609 *Biol.* 17:1124–1133. doi:10.1038/ncb3219.
- 610 Althoff, F., R.E. Karess, and C.F. Lehner. 2012. Spindle checkpoint-independent inhibition  
611 of mitotic chromosome segregation by *Drosophila* Mps1. *Mol. Biol. Cell.* 23:2275–  
612 2291. doi:10.1091/mbc.e12-02-0117.
- 613 De Antoni, A., C.G. Pearson, D. Cimini, J.C. Canman, V. Sala, L. Nezi, M. Mapelli, L.  
614 Sironi, M. Faretta, and A. Musacchio. 2005. The Mad1/Mad2 complex as a template for  
615 Mad2 activation in the spindle assembly checkpoint. *Curr. Biol.* 15:214–225.  
616 doi:10.1016/j.
- 617 Chen, R.H., A. Shevchenko, M. Mann, and A.W. Murray. 1998. Spindle checkpoint protein  
618 Xmad1 recruits Xmad2 to unattached kinetochores. *J. Cell Biol.* 143:283–295.  
619 doi:10.1083/jcb.143.2.283.
- 620 Chung, E., and R.-H. Chen. 2002. Spindle checkpoint requires Mad1-bound and Mad1-free  
621 Mad2. *Mol. Biol. Cell.* 13:1501–1511. doi:10.1091/mbc.02.
- 622 Collin, P., O. Nashchekina, R. Walker, and J. Pines. 2013. The spindle assembly checkpoint  
623 works like a rheostat rather than a toggle switch. *Nat. Cell Biol.* 15:1378–1385.  
624 doi:10.1038/ncb2855.
- 625 Conde, C., M. Osswald, J. Barbosa, T. Moutinho-Santos, D. Pinheiro, S. Guimarães, I.  
626 Matos, H. Maiato, and C.E. Sunkel. 2013. *Drosophila* Polo regulates the spindle  
627 assembly checkpoint through Mps1-dependent BubR1 phosphorylation. *EMBO J.*  
628 32:1761–77. doi:10.1038/emboj.2013.109.
- 629 Cox, J., and M. Mann. 2008. MaxQuant enables high peptide identification rates,  
630 individualized p.p.b.-range mass accuracies and proteome-wide protein quantification.  
631 *Nat. Biotechnol.* 26:1367–72. doi:10.1038/nbt.1511.
- 632 Dick, A.E., and D.W. Gerlich. 2013. Kinetic framework of spindle assembly checkpoint  
633 signalling. *Nat. Cell Biol.* 15:1370–1377. doi:10.1038/ncb2842.
- 634 Emre, D., R. Terracol, A. Poncet, Z. Rahmani, and R.E. Karess. 2011. A mitotic role for  
635 Mad1 beyond the spindle checkpoint. *J. Cell Sci.* 124:1664–1671.  
636 doi:10.1242/jcs.081216.
- 637 Faesen, A.C., M. Thanasoula, S. Maffini, C. Breit, F. Müller, S. Van Gerwen, T. Bange, and  
638 A. Musacchio. 2017. Basis of catalytic assembly of the mitotic checkpoint complex.  
639 *Nature.* 542:498–502. doi:10.1038/nature21384.
- 640 Fava, L.L., M. Kaulich, E.A. Nigg, and A. Santamaria. 2011. Probing the in vivo function of  
641 Mad1:C-Mad2 in the spindle assembly checkpoint. *EMBO J.* 30:3322–3336.  
642 doi:10.1038/emboj.2011.239.
- 643 Hustedt, N., M. Langegger, N. Schmidt, S. Heinrich, H. Windecker, K. Sewart, and S. Hauf.  
644 2014. Mad1 contribution to spindle assembly checkpoint signalling goes beyond  
645 presenting Mad2 at kinetochores. *EMBO Rep.* 15:291–298.  
646 doi:10.1002/embr.201338114.
- 647 Jelluma, N., A.B. Brenkman, I. McLeod, J.R. Yates, D.W. Cleveland, R.H. Medema, and  
648 G.J.P.L. Kops. 2008. Chromosomal instability by inefficient Mps1 auto-activation due  
649 to a weakened mitotic checkpoint and lagging chromosomes. *PLoS One.* 3:e2415.  
650 doi:10.1371/journal.pone.0002415.
- 651 Ji, Z., H. Gao, L. Jia, B. Li, and H. Yu. 2017. A sequential multi-target Mps1  
652 phosphorylation cascade promotes spindle checkpoint signaling. *Elife.* 6:1–23.  
653 doi:10.7554/eLife.22513.
- 654 Jia, H., X. Zhang, W. Wang, Y. Bai, Y. Ling, C. Cao, R.Z. Ma, H. Zhong, X. Wang, and Q.  
655 Xu. 2015. A putative N-terminal nuclear export sequence is sufficient for Mps1 nuclear

- 656 exclusion during interphase. *BMC Cell Biol.* 16:1–8. doi:10.1186/s12860-015-0048-6.
- 657 Kennedy, M.J., R.M. Hughes, L.A. Peteya, J.W. Schwartz, M.D. Ehlers, and C.L. Tucker.
- 658 2010. Rapid blue-light-mediated induction of protein interactions in living cells. *Nat.*
- 659 *Methods.* 7:973.
- 660 Kim, D.H., J.S. Han, P. Ly, Q. Ye, M.A. McMahon, K. Myung, K.D. Corbett, and D.W.
- 661 Cleveland. 2018. TRIP13 and APC15 drive mitotic exit by turnover of interphase- and
- 662 unattached kinetochore-produced MCC. *Nat. Commun.* 9:4354. doi:10.1038/s41467-
- 663 018-06774-1.
- 664 Lee, S., H. Park, T. Kyung, N.Y. Kim, S. Kim, J. Kim, and W. Do Heo. 2014. Reversible
- 665 protein inactivation by optogenetic trapping in cells. *Nat. Methods.* 1408:363–376.
- 666 doi:10.1007/978-1-4939-3512-3\_25.
- 667 Lee, S.H., H. Sterling, A. Burlingame, and F. McCormick. 2008. Tpr directly binds to Mad1
- 668 and Mad2 and is important for the Mad1-Mad2-mediated mitotic spindle checkpoint.
- 669 *Genes Dev.* 22:2926–2931. doi:10.1101/gad.1677208.
- 670 Li, C., A. Wen, B. Shen, J. Lu, Y. Huang, and Y. Chang. 2011. FastCloning: A highly
- 671 simplified, purification-free, sequence- and ligation-independent PCR cloning method.
- 672 *BMC Biotechnol.* 11:92. doi:10.1186/1472-6750-11-92.
- 673 Lince-Faria, M., S. Maffini, B. Orr, Y. Ding, C. Florindo, C.E. Sunkel, Á. Tavares, J.
- 674 Johansen, K.M. Johansen, and H. Maiato. 2009. Spatiotemporal control of mitosis by the
- 675 conserved spindle matrix protein megator. *J. Cell Biol.* 184:647–657.
- 676 doi:10.1083/jcb.200811012.
- 677 London, N., and S. Biggins. 2014. Mad1 kinetochore recruitment by Mps1-mediated
- 678 phosphorylation of Bub1 signals the spindle checkpoint. *Genes Dev.* 28:140–52.
- 679 doi:10.1101/gad.233700.113.
- 680 London, N., S. Ceto, J.A. Ranish, and S. Biggins. 2012. Phosphoregulation of Spc105 by
- 681 Mps1 and PP1 regulates Bub1 localization to kinetochores. *Curr. Biol.* 22:900–906.
- 682 doi:10.1016/j.cub.2012.03.052.
- 683 Maciejowski, J., K.A. George, M.E. Terret, C. Zhang, K.M. Shokat, and P. V. Jallepalli.
- 684 2010. Mps1 directs the assembly of Cdc20 inhibitory complexes during interphase and
- 685 mitosis to control M phase timing and spindle checkpoint signaling. *J. Cell Biol.*
- 686 190:89–100. doi:10.1083/jcb.201001050.
- 687 Malureanu, L.A., K.B. Jeganathan, M. Hamada, L. Wasilewski, J. Davenport, and J.M. van
- 688 Deursen. 2009. BubR1 N Terminus Acts as a Soluble Inhibitor of Cyclin B Degradation
- 689 by APC/CCdc20 in Interphase. *Dev. Cell.* 16:118–131.
- 690 doi:10.1016/j.devcel.2008.11.004.
- 691 Meraldi, P., V.M. Draviam, and P.K. Sorger. 2004. Timing and checkpoints in the regulation
- 692 of mitotic progression. *Dev. Cell.* 7:45–60. doi:10.1016/j.devcel.2004.06.006.
- 693 Michalski, A., E. Damoc, J.-P. Hauschild, O. Lange, A. Wieghaus, A. Makarov, N. Nagaraj,
- 694 J. Cox, M. Mann, and S. Horning. 2011. Mass spectrometry-based proteomics using Q
- 695 Exactive, a high-performance benchtop quadrupole Orbitrap mass spectrometer. *Mol.*
- 696 *Cell. Proteomics.* 10:M111.011015. doi:10.1074/mcp.M111.011015.
- 697 Mora-Santos, M. del M., A. Hervas-Aguilar, K. Sewart, T.C. Lancaster, J.C. Meadows, and
- 698 J.B.A. Millar. 2016. Bub3-Bub1 Binding to Spc7/KNL1 Toggles the Spindle
- 699 Checkpoint Switch by Licensing the Interaction of Bub1 with Mad1-Mad2. *Curr. Biol.*
- 700 26:2642–2650. doi:10.1016/j.cub.2016.07.040.
- 701 Moura, M., M. Osswald, N. Leça, J. Barbosa, A.J. Pereira, H. Maiato, C.E. Sunkel, and C.
- 702 Conde. 2017. Protein phosphatase 1 inactivates Mps1 to ensure efficient spindle
- 703 assembly checkpoint silencing. *Elife.* 6:1–29. doi:10.7554/eLife.25366.
- 704 Olsen, J. V., B. Macek, O. Lange, A. Makarov, S. Horning, and M. Mann. 2007. Higher-
- 705 energy C-trap dissociation for peptide modification analysis. *Nat. Methods.* 4:709–712.



- 706 doi:10.1038/nmeth1060.
- 707 Osswald, M., A.F. Santos, and E. Morais-de-Sá. 2019. Light-Induced Protein Clustering for  
708 Optogenetic Interference and Protein Interaction Analysis in *Drosophila* S2 Cells.  
709 *Biomolecules*. 9:61. doi:10.3390/biom9020061.
- 710 Primorac, I., J.R. Weir, E. Chiroli, F. Gross, I. Hoffmann, S. van Gerwen, A. Ciliberto, and  
711 A. Musacchio. 2013. Bub3 reads phosphorylated MELT repeats to promote spindle  
712 assembly checkpoint signaling. *Elife*. 2013:1–20. doi:10.7554/eLife.01030.
- 713 Qi, H., U. Rath, D. Wang, Y.-Z. Xu, Y. Ding, W. Zhang, M.J. Blacketer, M.R. Paddy, J.  
714 Girton, J. Johansen, and K.M. Johansen. 2004. Megator, an essential coiled-coil protein  
715 that localizes to the putative spindle matrix during mitosis in *Drosophila*. *Mol. Biol.*  
716 *Cell*. 15:4854–4865. doi:10.1091/mbc.E04.
- 717 Qian, J., M.A. García-Gimeno, M. Beullens, M.G. Manzione, G. Van der Hoeven, J.C. Igual,  
718 M. Heredia, P. Sanz, L. Gelens, and M. Bollen. 2017. An attachment-independent  
719 biochemical timer of the spindle assembly checkpoint. *Mol. Cell*. 68:715–730.  
720 doi:10.1016/j.molcel.2017.10.011.
- 721 Rappsilber, J., M. Mann, and Y. Ishihama. 2007. Protocol for micro-purification, enrichment,  
722 pre-fractionation and storage of peptides for proteomics using StageTips. *Nat. Protoc.*  
723 2:1896–1906. doi:10.1038/nprot.2007.261.
- 724 Resende, L.P., A. Monteiro, R. Brás, T. Lopes, and C.E. Sunkel. 2018. Aneuploidy in  
725 intestinal stem cells promotes gut dysplasia in *Drosophila*. *J. Cell Biol.* 217:3930–3946.  
726 doi:10.1083/jcb.201804205.
- 727 Rodriguez-Bravo, V., J. Maciejowski, J. Corona, H. Kon K. Buch, P. Collin, M.T. Kanemaki,  
728 J. V. Shah, and P. V. Jallepalli. 2014. Nuclear pores protect genome integrity by  
729 assembling a premitotic and Mad1-dependent anaphase inhibitor. *Cell*. 156:1017–1031.  
730 doi:10.1016/j.cell.2014.01.010.
- 731 Rodriguez-Rodriguez, J.A., C. Lewis, K.L. McKinley, V. Sikirzhyski, J. Corona, J.  
732 Maciejowski, A. Khodjakov, I.M. Cheeseman, and P. V. Jallepalli. 2018. Distinct roles  
733 of RZZ and Bub1-KNL1 in mitotic checkpoint signaling and kinetochore expansion.  
734 *Curr. Biol*. 28:3422–3429.e5. doi:10.1016/j.cub.2018.10.006.
- 735 Schittenhelm, R.B., R. Chaleckis, and C.F. Lehner. 2009. Intrakinetochore localization and  
736 essential functional domains of *Drosophila* Spc105. *EMBO J*. 28:2374–2386.  
737 doi:10.1038/emboj.2009.188.
- 738 Schweizer, N., C. Ferrás, D.M. Kern, E. Logarinho, I.M. Cheeseman, and H. Maiato. 2013.  
739 Spindle assembly checkpoint robustness requires Tpr-mediated regulation of  
740 Mad1/Mad2 proteostasis. *J. Cell Biol.* 203:883–893. doi:10.1083/jcb.201309076.
- 741 Scott, R.J., C.P. Lusk, D.J. Dilworth, J.D. Aitchison, and R.W. Wozniak. 2005. Interactions  
742 between Mad1p and the nuclear transport machinery in the east *Saccharomyces*  
743 *cerevisiae*. *Mol. Biol. Cell*. 16:4362–4374. doi:10.1091/mbc.E05.
- 744 Shepperd, L.A., J.C. Meadows, A.M. Sochaj, T.C. Lancaster, J. Zou, G.J. Buttrick, J.  
745 Rappsilber, K.G. Hardwick, and J.B.A. Millar. 2012. Phosphodependent recruitment of  
746 Bub1 and Bub3 to Spc7/KNL1 by Mph1 kinase maintains the spindle checkpoint. *Curr.*  
747 *Biol*. 22:891–899. doi:10.1016/j.cub.2012.03.051.
- 748 Simonetta, M., R. Manzoni, R. Mosca, M. Mapelli, L. Massimiliano, M. Vink, B. Novak, A.  
749 Musacchio, and A. Ciliberto. 2009. The influence of catalysis on Mad2 activation  
750 dynamics. *PLoS Biol*. 7. doi:10.1371/journal.pbio.1000010.
- 751 Sironi, L., M. Mapelli, S. Knapp, A. DeAntoni, K.-T. Jeang, and A. Musacchio. 2002. The  
752 Mad1-Mad2 complex: implications of a “safety belt” binding mechanism for the spindle  
753 checkpoint. *embo J*. 21:2496–2506. doi:10.1107/s0108767302093947.
- 754 Souza, C.P. De, S.B. Hashmi, T. Nayak, B. Oakley, and S.A. Osmani. 2009. Mlp1 acts as a  
755 mitotic scaffold to spatially regulate spindle assembly checkpoint proteins in *Aspergillus*

- 756 *nidulans*. *Mol. Biol. Cell*. 20:2146–2159. doi:10.1091/mbc.E08.
- 757 Sudakin, V., G.K.T. Chan, and T.J. Yen. 2001. Checkpoint inhibition of the APC/C in HeLa  
758 cells is mediated by a complex of BUBR1, BUB3, CDC20, and MAD2. *J. Cell Biol.*  
759 154:925–936. doi:10.1083/jcb.200102093.
- 760 Vink, M., M. Simonetta, P. Transidico, K. Ferrari, M. Mapelli, A. De Antoni, L.  
761 Massimiliano, A. Ciliberto, M. Faretta, E.D. Salmon, and A. Musacchio. 2006. In vitro  
762 FRAP identifies the minimal requirements for Mad2 kinetochore dynamics. *Curr. Biol.*  
763 16:755–766. doi:10.1016/j.cub.2006.03.057.
- 764 Vleugel, M., M. Omerzu, V. Groenewold, M.A. Hadders, S.M.A. Lens, and G.J.P.L. Kops.  
765 2015. Sequential multisite phospho-regulation of KNL1-BUB3 interfaces at mitotic  
766 kinetochores. *Mol. Cell*. 57:824–835. doi:10.1016/j.molcel.2014.12.036.
- 767 Yamagishi, Y., C.-H. Yang, Y. Tanno, and Y. Watanabe. 2012. MPS1/Mph1 phosphorylates  
768 the kinetochore protein KNL1/Spc7 to recruit SAC components. *Nat. Cell Biol.* 14:746–  
769 752. doi:10.1038/ncb2515.
- 770 Zhang, G., T. Kruse, B. López-Méndez, K.B. Sylvestersen, D.H. Garvanska, S. Schopper,  
771 M.L. Nielsen, and J. Nilsson. 2017. Bub1 positions Mad1 close to KNL1 MELT repeats  
772 to promote checkpoint signalling. *Nat. Commun.* 8:15822. doi:10.1038/ncomms15822.
- 773 Zhang, X., Q. Yin, Y. Ling, Y. Zhang, R. Ma, Q. Ma, C. Cao, H. Zhong, X. Liu, and Q. Xu.  
774 2011. Two LXXLL motifs in the N terminus of Mps1 are required for Mps1 nuclear  
775 import during G<sub>2</sub>/M transition and sustained spindle checkpoint responses. *Cell Cycle*.  
776 10:2742–2750. doi:10.4161/cc.10.16.15927.
- 777
- 778
- 779
- 780
- 781
- 782
- 783
- 784
- 785
- 786
- 787
- 788
- 789
- 790
- 791
- 792
- 793
- 794
- 795
- 796



797

798

799

## 800 **FIGURE LEGENDS**

801 **Figure 1: Msp1 promotes the dissociation of Mad1 from nuclear pore complexes during**

802 **prophase.** (A,B) Representative mitotic progression (A) and quantification (B) of Mad1-

803 EGFP or Megator-EGFP levels at nuclear envelope (NE) and of mCherry-Tubulin levels in

804 the nucleus of control and Mps1-depleted *Drosophila* S2 cells . Mitotic progression was

805 monitored through time-lapse microscopy. Time 0s indicates nuclear envelope breakdown

806 (NEB) and was defined as the moment mCherry-Tubulin signal becomes detectable in the

807 nucleus. Mad1-EGFP (N ≥ 7 cells), Megator-EGFP (N ≥ 6 cells) and mCherry-Tubulin

808 fluorescence intensities were normalized to the mean value before NEB. (C) Representative

809 immunofluorescence images of Mps1<sup>T490Ph</sup> localization pattern in interphase and prophase S2

810 cells. (D, E) Representative immunofluorescence images (D) and quantifications (E) of Mad1

811 levels at the nuclear envelope of interphase control S2 cells and interphase S2 cells

812 expressing EGFP-Mps1<sup>WT</sup>, EGFP-Mps1<sup>WT</sup>-NLS or EGFP-Mps1<sup>KD</sup>-NLS. The insets display

813 magnifications of the outlined regions. Mad1 fluorescence intensities at the nuclear envelope

814 were determined relative to Megator signal (N ≥ 21 cells for each condition). Data

815 information: in (B) data is presented as mean ± SD, in (E) data is presented as median with

816 the interquartile range. Asterisks indicate that differences between mean ranks are

817 statistically significant, \*\*p<0.005 (Kruskal-Wallis, Dunn's multiple comparison test). Scale

818 bars: 5µm.

819

820 **Figure 2: Msp1-mediated phosphorylation of Megator disrupts its interaction with**

821 **Mad1.** (A) Immunoprecipitates (IP) of Mad1 from lysates of asynchronous (-colchicine) and

822 mitotically-enriched (+colchicine) S2 cultures incubated in the presence or absence of Mps1

823 RNAi for 120 hours. Colchicine (30µM) was incubated for 10 hours and MG132 (20µM) was

824 added 4 hours prior to cell lysis. Mad1 IPs and corresponding inputs were blotted for the

825 indicated proteins. (B) Western blot analysis of Megator hyperphosphorylation in cell lysates

826 from the same experimental conditions as in (A). To validate the slower migrating band as an

827 hyperphosphorylated form of Megator, the lysate of control colchicine-incubated cells was

828 treated with λ-phosphatase (λPP) for 1 hour. (C) *In vitro* kinase assay with the indicated

829 recombinant fragments of MBP-Megator and GST-Mps1 in the presence of [γ-<sup>32</sup>P]ATP for

830 30 min. Phosphorylation was detected by autoradiography and protein levels visualized by  
831 coomassie blue staining. (D) Schematic representation of *Drosophila* Megator obtained from  
832 the Eukaryotic Linear Motif (ELM) resource and Clustal Omega (EMBL-EBI) local sequence  
833 alignment for the indicated Megator/Tpr orthologues. Amino acids in dark gray background  
834 are conserved and amino acids in light gray background have similar chemical properties.  
835 Symbols: \* fully conserved residue; : conservation between groups of strongly similar  
836 properties; . conservation between groups of weakly similar properties. Residues  
837 phosphorylated by Mps1 were identified by mass spectrometry analysis after *in vitro* kinase  
838 assay. Phospho-sites (P) were identified with MaxQuant/Andromeda with a decoy FDR of  
839 0.01 on peptide and site level. (E) Pull-downs of recombinant purified MBP-Megator<sup>1187-</sup>  
840 <sup>1655/WT</sup>, MBP-Megator<sup>1187-1655/WT</sup> phosphorylated by GST-Mps1, or MBP-Megator<sup>1187-1655/T4D</sup>  
841 by bead-immobilized 6xHis-Mad1<sup>1-493</sup> or 6xHis-BubR1<sup>1-358</sup> (negative control). Both beads  
842 (B) and flow-through (FT) were blotted for the indicated proteins. (F) Quantification of  
843 MBP-Megator binding to 6xHis-Mad1<sup>1-493</sup> from pull-downs in (E). The graph represents the  
844 ratio between the chemiluminescence signal intensities of MBP-Megator and 6xHis-Mad1<sup>1-</sup>  
845 <sup>493</sup> from two independent experiments. The values obtained for MBP-Megator<sup>1187-1655/WT</sup> were  
846 set to 1. (G,H) Representative immunofluorescence images (G) and schematic representation  
847 (H) of EGFP-Megator<sup>1187-1655</sup> clustering by light-activated reversible inhibition by assembled  
848 trap (LARIAT) in mitotic S2 cells. Fusion of CIB1 with the multimerization domain from  
849 CaMKII $\alpha$  (MP) forms dodecamers in the cytoplasm. The CRY2 photolyase homology region  
850 (PHR) is fused with an anti-GFP nanobody that binds specifically to EGFP-Megator. Blue  
851 light triggers CRY2 oligomerization and binding to CIB1, thus trapping EGFP-Megator into  
852 multimeric protein clusters. In the dark, CRY2 reverts spontaneously to its ground state and  
853 the clusters disassemble. LARIAT-induced clusters of EGFP-aPKC were used as negative  
854 control. The insets display magnifications of the outlined regions. S2 cells were treated with  
855 colchicine (30 $\mu$ M) for 10 hours and MG132 (20 $\mu$ M) for 4 hours followed by a 30 minute  
856 period of blue light irradiation. Expression of LARIAT-modules, EGFP-Megator<sup>1187-1655</sup>  
857 transgenes and EGFP-aPKC was induced for 24 hours prior immunofluorescence analysis.  
858 (I,J) Quantification of Mad1 levels at EGFP-Megator<sup>1187-1655</sup> clusters (I) and at kinetochores  
859 (J). Mad1 fluorescence intensities at clusters were determined relative to GFP-Megator<sup>1187-</sup>  
860 <sup>1655</sup> signal (N $\geq$ 114 clusters for each condition) and at kinetochores relative to Mad1 cytosolic  
861 signal (N $\geq$ 64 kinetochores for each condition). Data information: in (F), (I), and (J), data are  
862 presented as mean  $\pm$  SD. Asterisks indicate that differences between mean ranks are

863 statistically significant, \*\*  $p < 0.01$ , \*\*\*\*  $p < 0.0001$ , (Kruskal-Wallis, Dunn's multiple  
864 comparison test). Scale bars:  $5\mu\text{m}$

865

866 **Figure 3: Recruitment of Mad1 to unattached kinetochores and robust SAC signaling**

867 **require phosphorylation of Megator by Mps1.** (A) Representative immunofluorescence

868 images of Mad1 localization in control and Megator-depleted interphase cells. The insets

869 display magnifications of the outlined regions. (B,C) Representative immunofluorescence

870 images (B) and corresponding quantifications (C) of Mad1 at the nuclear envelope of

871 interphase S2 cells depleted of endogenous Megator and expressing the indicated Megator-

872 EGFP transgenes. When indicated, cultures were incubated in the presence of Mps1 RNAi

873 for 120 hours. The insets display magnifications of the outlined regions. Mad1 fluorescence

874 intensities were determined relative to Megator-EGFP signal ( $N \geq 41$  cells for each

875 condition). (D,E) Representative immunofluorescence images (D) and corresponding

876 quantification (E) of Mad1 at unattached kinetochores of S2 cells depleted of endogenous

877 Megator and expressing the indicated Megator-EGFP transgenes. When indicated, cultures

878 were incubated in the presence of Mps1 RNAi for 120 hours. To generate unattached

879 kinetochores, cells were incubated with colchicine ( $30\mu\text{M}$ ) and MG132 ( $20\mu\text{M}$ ) for 30min

880 prior to fixation. The insets display magnifications of the outlined regions. Mad1

881 fluorescence intensities were determined relative to CID signal ( $N \geq 125$  kinetochores for

882 each condition). (F) Mitotic timings of S2 cells depleted of endogenous Megator and

883 expressing the indicated Megator-EGFP transgenes under unperturbed conditions or upon

884 addition of taxol ( $100\text{nM}$ ) or colchicine ( $30\mu\text{M}$ ) ( $N \geq 11$  cells for each condition). Expression

885 of Megator-EGFP transgenes in (B-F) was induced for 24 hours prior processing for

886 immunofluorescence analysis or live cell imaging. Data information: in (C) data is presented

887 as median with interquartile range; in (E) and (F) data is presented as mean  $\pm$  SD. Asterisks

888 indicate that differences between mean ranks are statistically significant, \*  $p < 0.05$ , \*\*  $p <$

889  $0.01$ , \*\*\*  $p < 0.001$ , \*\*\*\*  $p < 0.0001$  (Kruskal-Wallis, Dunn's multiple comparison test in (C)

890 and (E) and Student's t-test in (F)). Scale bars:  $5\mu\text{m}$ .

891

892 **Figure 4: Constitutively impaired Mad1-Megator interaction reduces C-Mad2 levels at**

893 **kinetochores and the strength of SAC signalling.** (A,B) Representative western blots (A)

894 and corresponding quantifications (B) of Megator, Mad1 and Mad2 protein levels in lysates

895 from control or Megator-depleted S2 cells expressing the indicated Megator-EGFP

896 transgenes. When indicated, cultures were incubated in the presence of Mps1 RNAi for 120h.

897 The chemiluminescence signal intensities of Megator, Mad1 and Mad2 were determined  
898 relative to tubulin signal. The graph represents the quantification of relative protein levels  
899 from at least two independent experiments. The mean value obtained for control parental  
900 cells was set to 1. (C,D) Representative immunofluorescence images (C) and corresponding  
901 quantifications (D) of C-Mad2 at unattached kinetochores of S2 cells depleted of endogenous  
902 Megator and expressing the indicated Megator-EGFP transgenes. When indicated, cultures  
903 were incubated in the presence of Mps1 RNAi for 120 hours. To generate unattached  
904 kinetochores, cells were incubated with colchicine (30 $\mu$ M) and MG132 (20 $\mu$ M) for 30min  
905 prior to immunofluorescence analysis. The insets display magnifications of the outlined  
906 regions. C-Mad2 fluorescence intensities were determined relative to CID signal ( $N \geq 148$   
907 kinetochores for each condition). (E) Mitotic timings of S2 cells depleted of endogenous  
908 Megator and expressing the indicated Megator-EGFP transgenes under unperturbed  
909 conditions or upon addition of taxol (100nM) or colchicine (30 $\mu$ M) ( $N \geq 10$  cells for each  
910 condition). Mitotic timings of S2 cells expressing Megator<sup>WT</sup>-EGFP are the same as used in  
911 Figure 3F. (F,G) Representative immunofluorescence images (F) and corresponding  
912 quantifications (G) of C-Mad2 levels at unattached kinetochores of control or Megator-  
913 depleted S2 cells treated with colchicine (30 $\mu$ M) and MG132 (20 $\mu$ M) for 30min. The insets  
914 display magnifications of the outlined regions. C-Mad2 fluorescence intensities were  
915 determined relative to CID signal ( $N \geq 224$  kinetochores for each condition). (H) Mitotic  
916 timings of control and Megator-depleted S2 cells under unperturbed conditions or upon  
917 addition of taxol (100nM) or colchicine (30 $\mu$ M) ( $N \geq 8$  cells for each condition). Expression  
918 of Megator-EGFP transgenes in (A-E) was induced for 24 hours prior processing for  
919 immunofluorescence analysis or live cell imaging. Data information: in (B) data is presented  
920 as mean  $\pm$  SEM; in (D), (E), (G), and (H), data are presented as mean  $\pm$  SD. Asterisks  
921 indicate that differences between mean ranks are statistically significant, \* $p < 0.05$ , \*\*  $p < 0.01$ ,  
922 \*\*\* $p < 0.0001$ , (Kruskal-Wallis, Dunn's multiple comparison test in (D) and Student's t-test  
923 in (E), (G) and (H). Scale bars: 5 $\mu$ m.

924

925 **Figure 5. Depletion of Megator restores Mad1 kinetochore recruitment and mitotic**  
926 **fidelity in *Drosophila mps1-null* neuroblasts.** (A,B) Representative immunofluorescence  
927 images with ploidy histograms (A) and corresponding quantifications (B) of Mad1 levels at  
928 unattached kinetochores of  $w^{1118}$ , *InscGal4>UAS-MegatorRNAi*, *ald<sup>G4422</sup>* or  
929 *ald<sup>G4422</sup>;InscGal4>UAS-MegatorRNAi* neuroblasts treated with colchicine (50 $\mu$ M) for 1.5  
930 hours. The insets display magnifications of the outlined regions. Mad1 fluorescence

931 intensities were determined relative to Spc105 signal. ( $N \geq 91$  kinetochores for each condition)  
932 (C-E) Mitotic progression (C), mitotic timing (D) and percentage of anaphases with lagging  
933 chromosomes (E) of  $w^{1118}$ ,  $InscGal4 > UAS-MegatorRNAi$ ,  $ald^{G4422}$  or  
934  $ald^{G4422}; InscGal4 > UAS-MegatorRNAi$  neuroblasts co-expressing Jupiter-GFP and H2B-  
935 mRFP. Mitotic progression was monitored through time-lapse microscopy and the mitotic  
936 timing was defined as the time cells spent from nuclear envelope breakdown (NEB) to  
937 anaphase onset (AO) ( $N \geq 14$  neuroblasts for each condition from at least two independent  
938 experiments). The arrowhead in (C) points to a lagging chromosome. (F) Proposed model for  
939 the control of Mad1 subcellular redistribution during the G2/M transition. In interphase,  
940 inactive Mps1 (unphosphorylated T-loop) is retained in the cytoplasm and Mad1-C-Mad2  
941 complexes are docked at the nucleoplasmic side of NPCs through Mad1 binding to Megator.  
942 During prophase, active Mps1 (phosphorylated T-loop) becomes detectable in the nucleus  
943 and is now able to phosphorylate Megator. This disrupts the nucleoporin interaction with  
944 Mad1, hence ensuring timely release of Mad1-C-Mad2 from NPCs. Dissociation from  
945 Megator enables Mad1-C-Mad2 to efficiently accumulate at prometaphase kinetochores and  
946 instate robust SAC signalling. Data information: in (A), (B), (C), and (E), data are presented  
947 as mean  $\pm$  SD. Asterisks indicate that differences between mean ranks are statistically  
948 significant, \* $p < 0.05$ , \*\*\*  $p < 0.001$ , \*\*\*\* $p < 0.0001$  (Kruskal-Wallis, Dunn's multiple  
949 comparison test). Scale bars:  $5\mu\text{m}$ .

950

951 **Figure S1: Additional information related to Figure 1.** (A) Kymograph representations of  
952 Mad1-EFGFP and Megator-EGFP localization pattern from movies in Figure 1A. (B) Data  
953 corresponding to the quantifications of nuclear envelope Mad1-EFGFP and Megator-EGFP  
954 from Figure 1B plotted in the same graph for comparison purposes. (C) Representative  
955 immunofluorescence images of EGFP-Mps1, Mps1<sup>T490Ph</sup> and Megator localization pattern in  
956 interphase control S2 cells and interphase S2 cells expressing EGFP-Mps1<sup>WT</sup>, EGFP-  
957 Mps1<sup>WT</sup>-NLS or EGFP-Mps1<sup>KD</sup>-NLS. The insets display magnifications of the outlined  
958 regions. Graphs represent the intensity profiles of GFP-Mps1, Mps1<sup>T490Ph</sup> and Megator signal  
959 along the dotted lines. Scale bar:  $5\mu\text{m}$

960

961 **Figure S2. Kinetochores-extrinsic activity of Mps1 contributes for Mad1 kinetochore**  
962 **recruitment** (A,B) Representative immunofluorescence images (A) and corresponding  
963 quantifications (B) of Mad1 and Mps1 levels at unattached kinetochores of neuroblasts from  
964  $w^{1118}$  or  $ald^{G4422}$  flies. When indicated, EGFP-Mps1-C<sup>term</sup> or EGFP-Mps1-WT transgenes

965 were expressed under control of *Mps1* native promoter in an *ald*<sup>G4422</sup> background. To  
966 generate unattached kinetochores, neuroblasts were incubated with colchicine (50 $\mu$ M) for 1.5  
967 hours. The insets display magnifications of the outlined regions. Mad1 and Mps1  
968 fluorescence intensities were determined relative to Spc105 signal (N  $\geq$  106 kinetochores for  
969 each condition). (C) Western blot analysis of endogenous Mps1, EGFP-Mps1-WT and  
970 EGFP-Mps1-C<sup>term</sup> levels in total lysates of 3<sup>rd</sup> *instar* larval brains from (A). (D) Western blot  
971 analysis of Mps1, Megator and Mad1 relative levels in control S2 cells and in cells depleted  
972 of the indicated proteins. Cells were incubated with MG123 (20 $\mu$ M) for 1 hour and with  
973 colchicine (30 $\mu$ M) for 2 hours. Asterisk denotes bands resulting from unspecific anti-GFP  
974 blotting. (E, F) Representative immunofluorescence images (E) and corresponding  
975 quantifications (F) of Mad1 and Mps1 levels at unattached kinetochores of control S2 cells  
976 and cells depleted of the indicated proteins. Cells were incubated with MG123 (20 $\mu$ M) for 1  
977 hour and with colchicine (30 $\mu$ M) for 2 hours. The insets display magnifications of the  
978 outlined regions. Mad1 and Mps1 fluorescence intensities were determined relative to CID  
979 signal (N  $\geq$  109 kinetochore for Mad1, N  $\geq$  139 kinetochores for Mps1). (G) Mitotic index  
980 quantification based on H3<sup>Ser10Ph</sup> staining of control S2 cells and cells depleted of the  
981 indicated proteins. Cells were incubated with colchicine (30 $\mu$ M) for time periods indicated.  
982 Data information: in (B), (F), and (G) data are presented as mean  $\pm$  SD. Asterisks indicate  
983 that differences between mean ranks are statistically significant, \*p<0.05, \*\*\*\*p<0.0001  
984 (Kruskal-Wallis, Dunn's multiple comparison test). Scale bars: 5 $\mu$ m.

985

986 **Figure S3: Depletion of Megator prevents intestinal dysplasia caused by lack of Mps1**  
987 **activity in intestinal stem cells.** (A) Schematic representation of the *Drosophila* posterior  
988 midgut epithelium under homeostatic conditions or after aneuploidy-induced dysplasia.  
989 Aneuploid ISCs/EBs over-proliferate and accumulate causing epithelium dysplasia (Resende  
990 et al., 2018). ISCs- intestinal stem cells, EBs – enteroblasts, EE –enteroendocrine cells, EC-  
991 enterocytes BM - basement membrane, VM- visceral muscle. (B,C) Representative  
992 immunofluorescence images (B) and corresponding quantifications (C) of the percentage of  
993 ISCs/ EBs (GFP-positive) in intestines with ISCs/EBs depleted of the indicated proteins.  
994 *GFP-UAS* was expressed alone or co-expressed with *UAS-MegatorRNAi* or *UAS-Mps1RNAi*  
995 under control of the *EsgGAL4* promoter during the first 20 days of adult flies. The insets  
996 display magnifications of the outlined regions. Quantification of percentage of ISCs/EBs  
997 relative to total number of cells (N  $\geq$  40 intestines). Data on graph represents mean  $\pm$  SD.



998 Asterisks indicate that differences between mean ranks are statistically significant, \*  $p < 0.05$ ;  
999 \*\*\*  $p < 0.001$  (Kruskal-Wallis, Dunn's multiple comparison test). Scale bar: 50 $\mu$ m.

1000

1001 **Figure S4: Timely phosphorylation of Megator coordinates Mad1 subcellular**  
1002 **localization with cell cycle progression to ensure a fully-functional spindle assembly**  
1003 **checkpoint.** Preventing Mps1-mediated phosphorylation of Megator on T1259, T1295,  
1004 T1338 and T1390 (Megator<sup>T4A</sup>) retains Mad1 associated with the nucleoporin during mitosis.  
1005 This precludes proper recruitment of Mad1-C-Mad2 to prometaphase/unattached  
1006 kinetochores and consequently compromises the strength of SAC signalling. On the other  
1007 hand, constitutive phosphorylation of these residues (Megator<sup>T4D</sup>) abrogates Mad1 interaction  
1008 with Megator throughout the cell cycle. Though able to efficiently accumulate Mad1 at  
1009 prometaphase/unattached kinetochores, Megator<sup>T4D</sup> cells also exhibit a weakened SAC  
1010 function. This likely results from reduced formation of Mad1-C-Mad2 heterotetramers at  
1011 NPCs during interphase, which possibly limits the assembly of pre-mitotic MCC (Rodriguez-  
1012 Bravo et al., 2014) and the association of C-Mad2 with kinetochores latter in mitosis. Hence,  
1013 robust SAC function requires the interaction of Mad1 with Megator at NPCs to be tightly  
1014 coordinated with cell cycle progression. Activation and nuclear import of Mps1 during late  
1015 G2/prophase provides a molecular switch that ensures timely release of Mad1 from NPCs  
1016 precisely when kinetochores must instate SAC signalling. This kinetochore-extrinsic  
1017 mechanism enables the cell to produce MCC both at NPCs in interphase and at kinetochores  
1018 during mitosis, so that the checkpoint is sufficiently robust to safeguard against chromosome  
1019 mis-segregation.

1020

1021



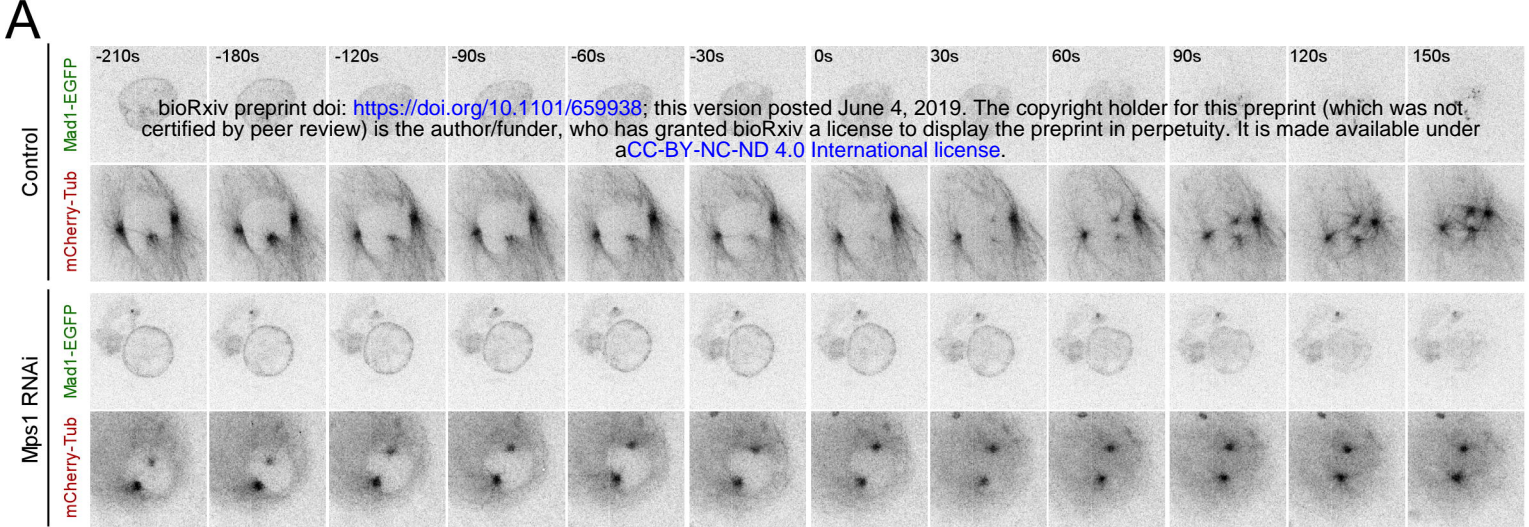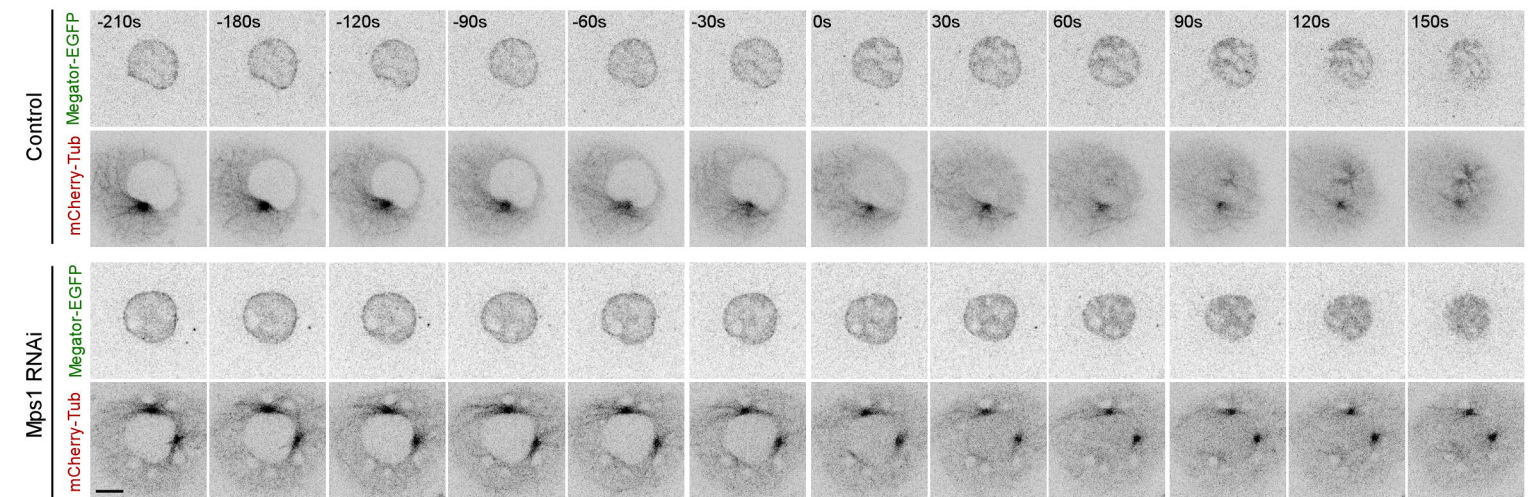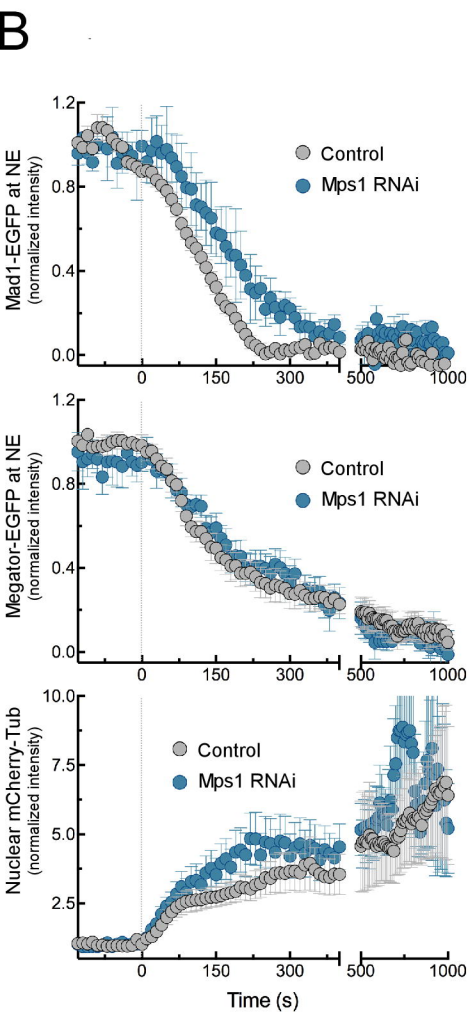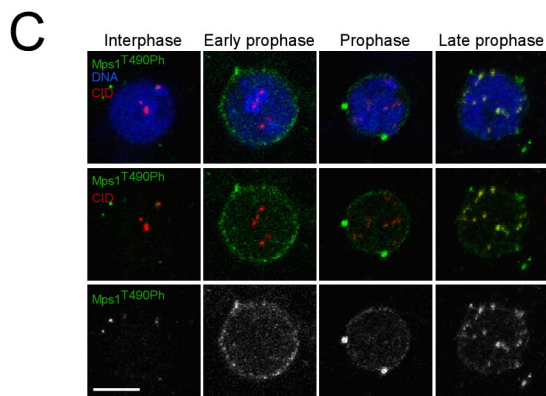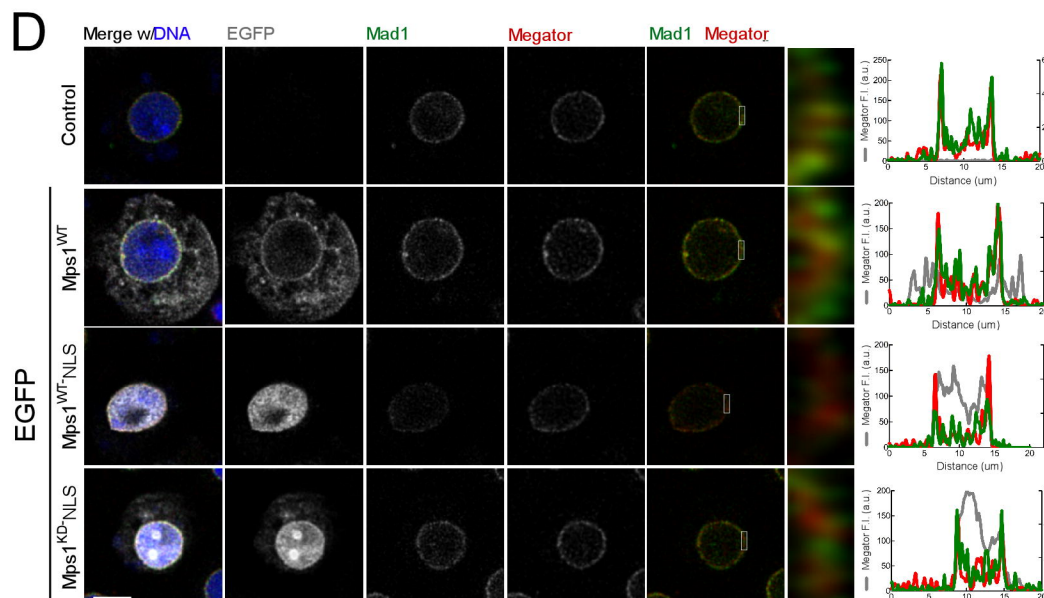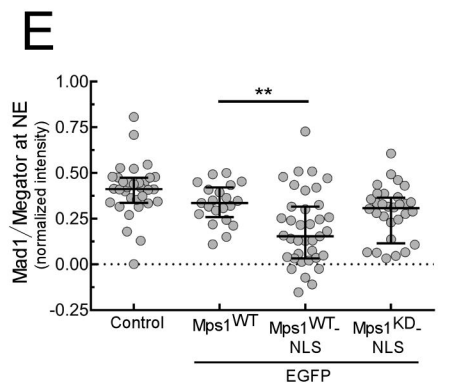



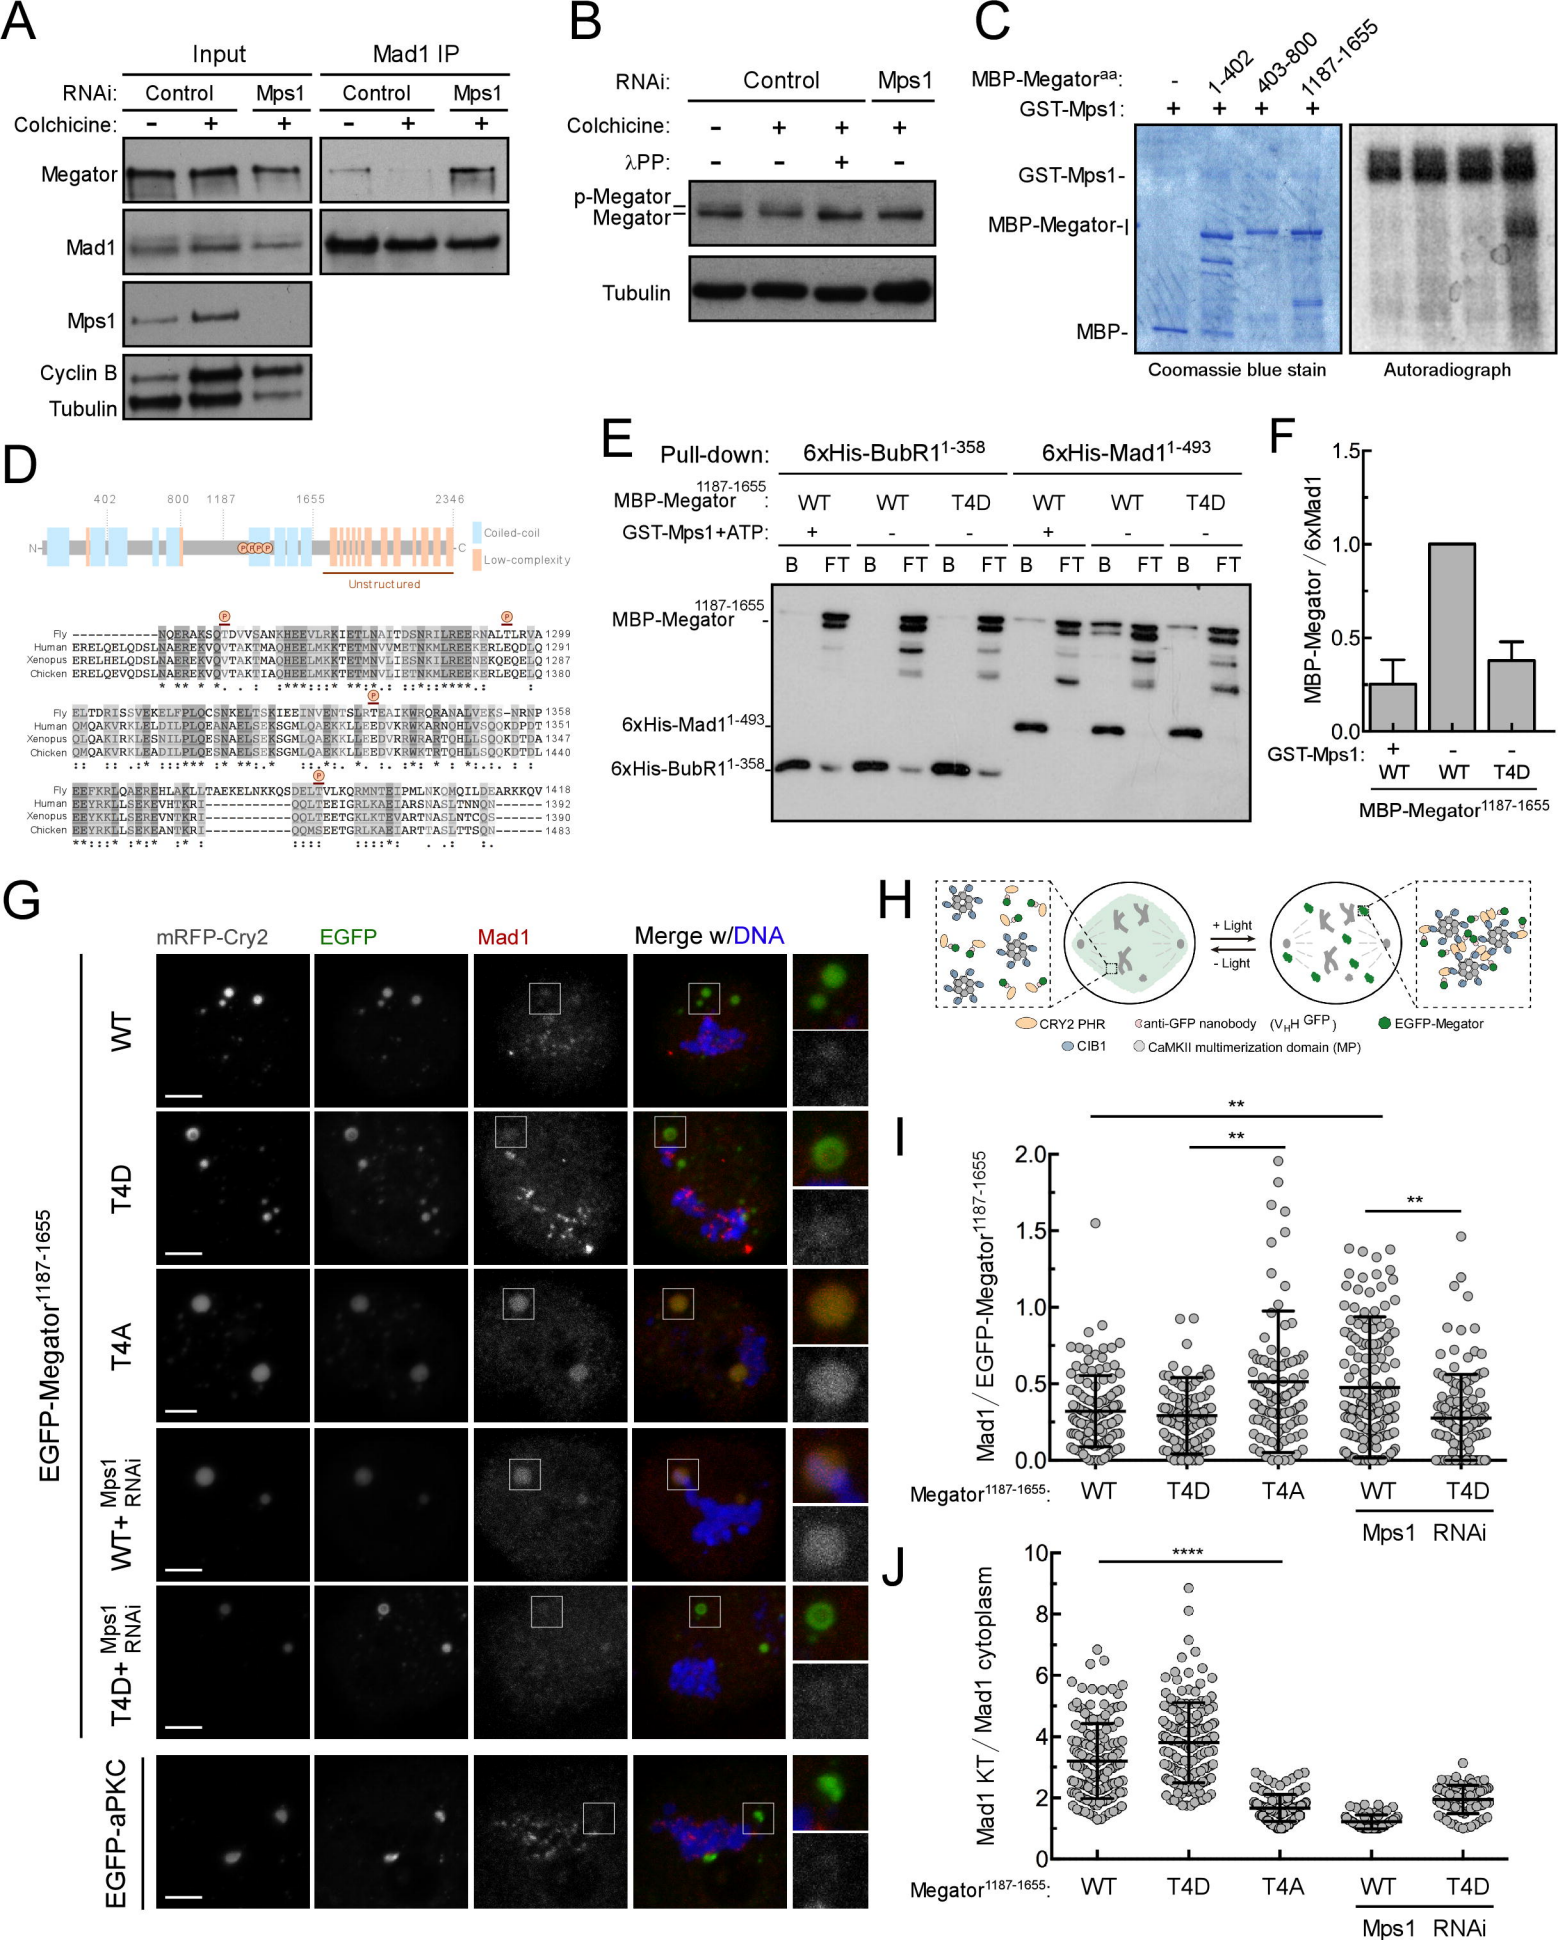



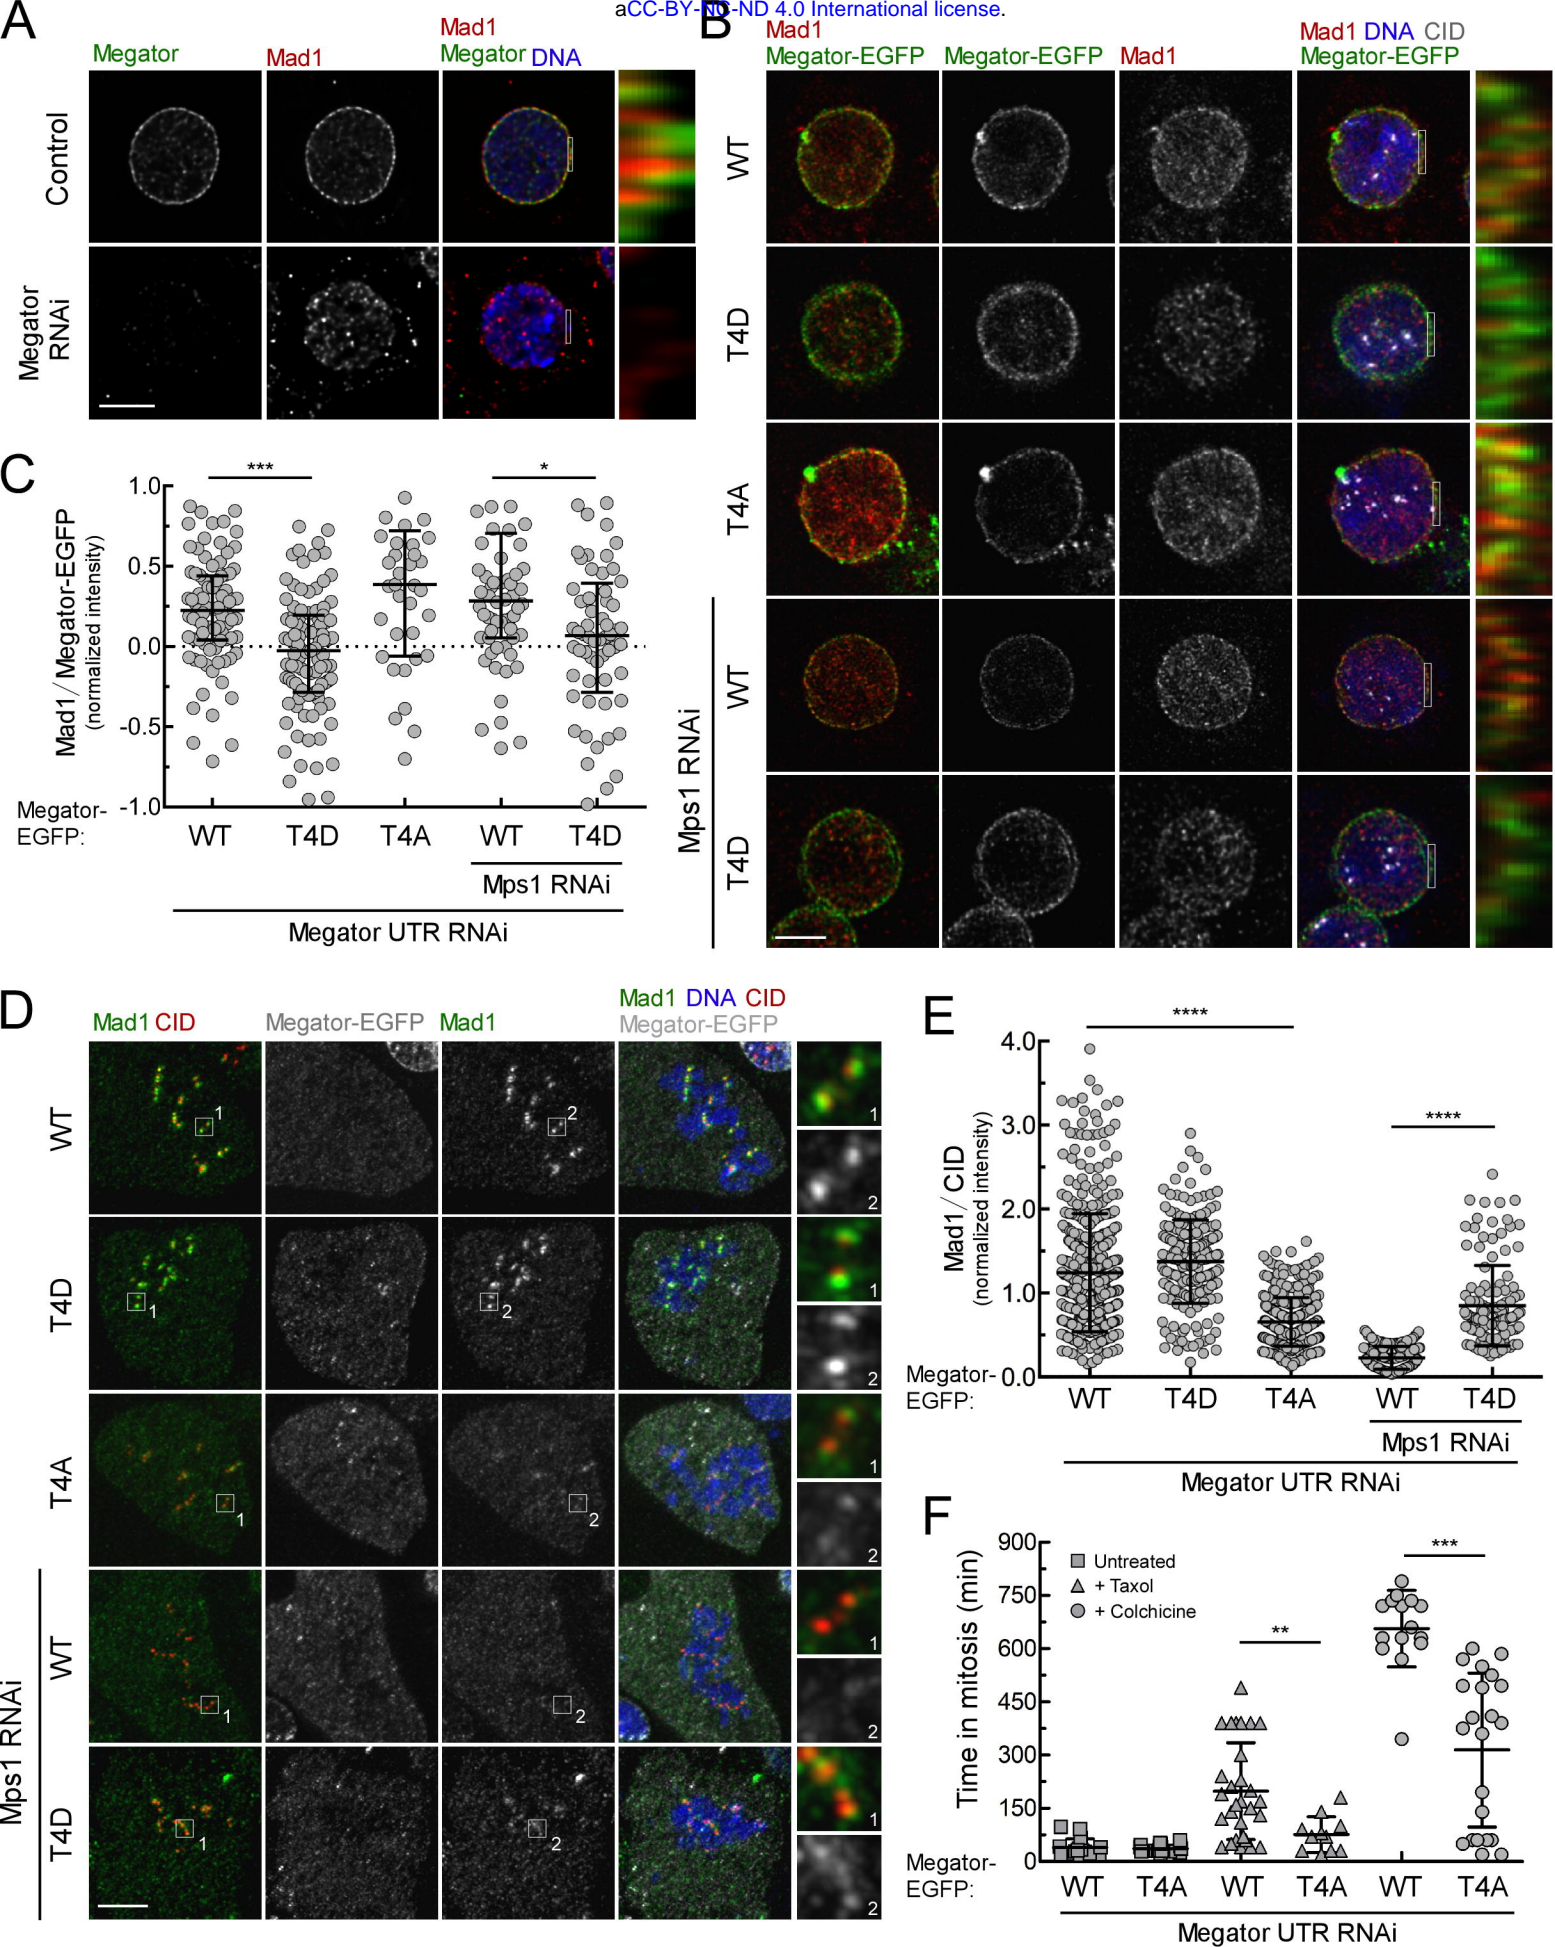

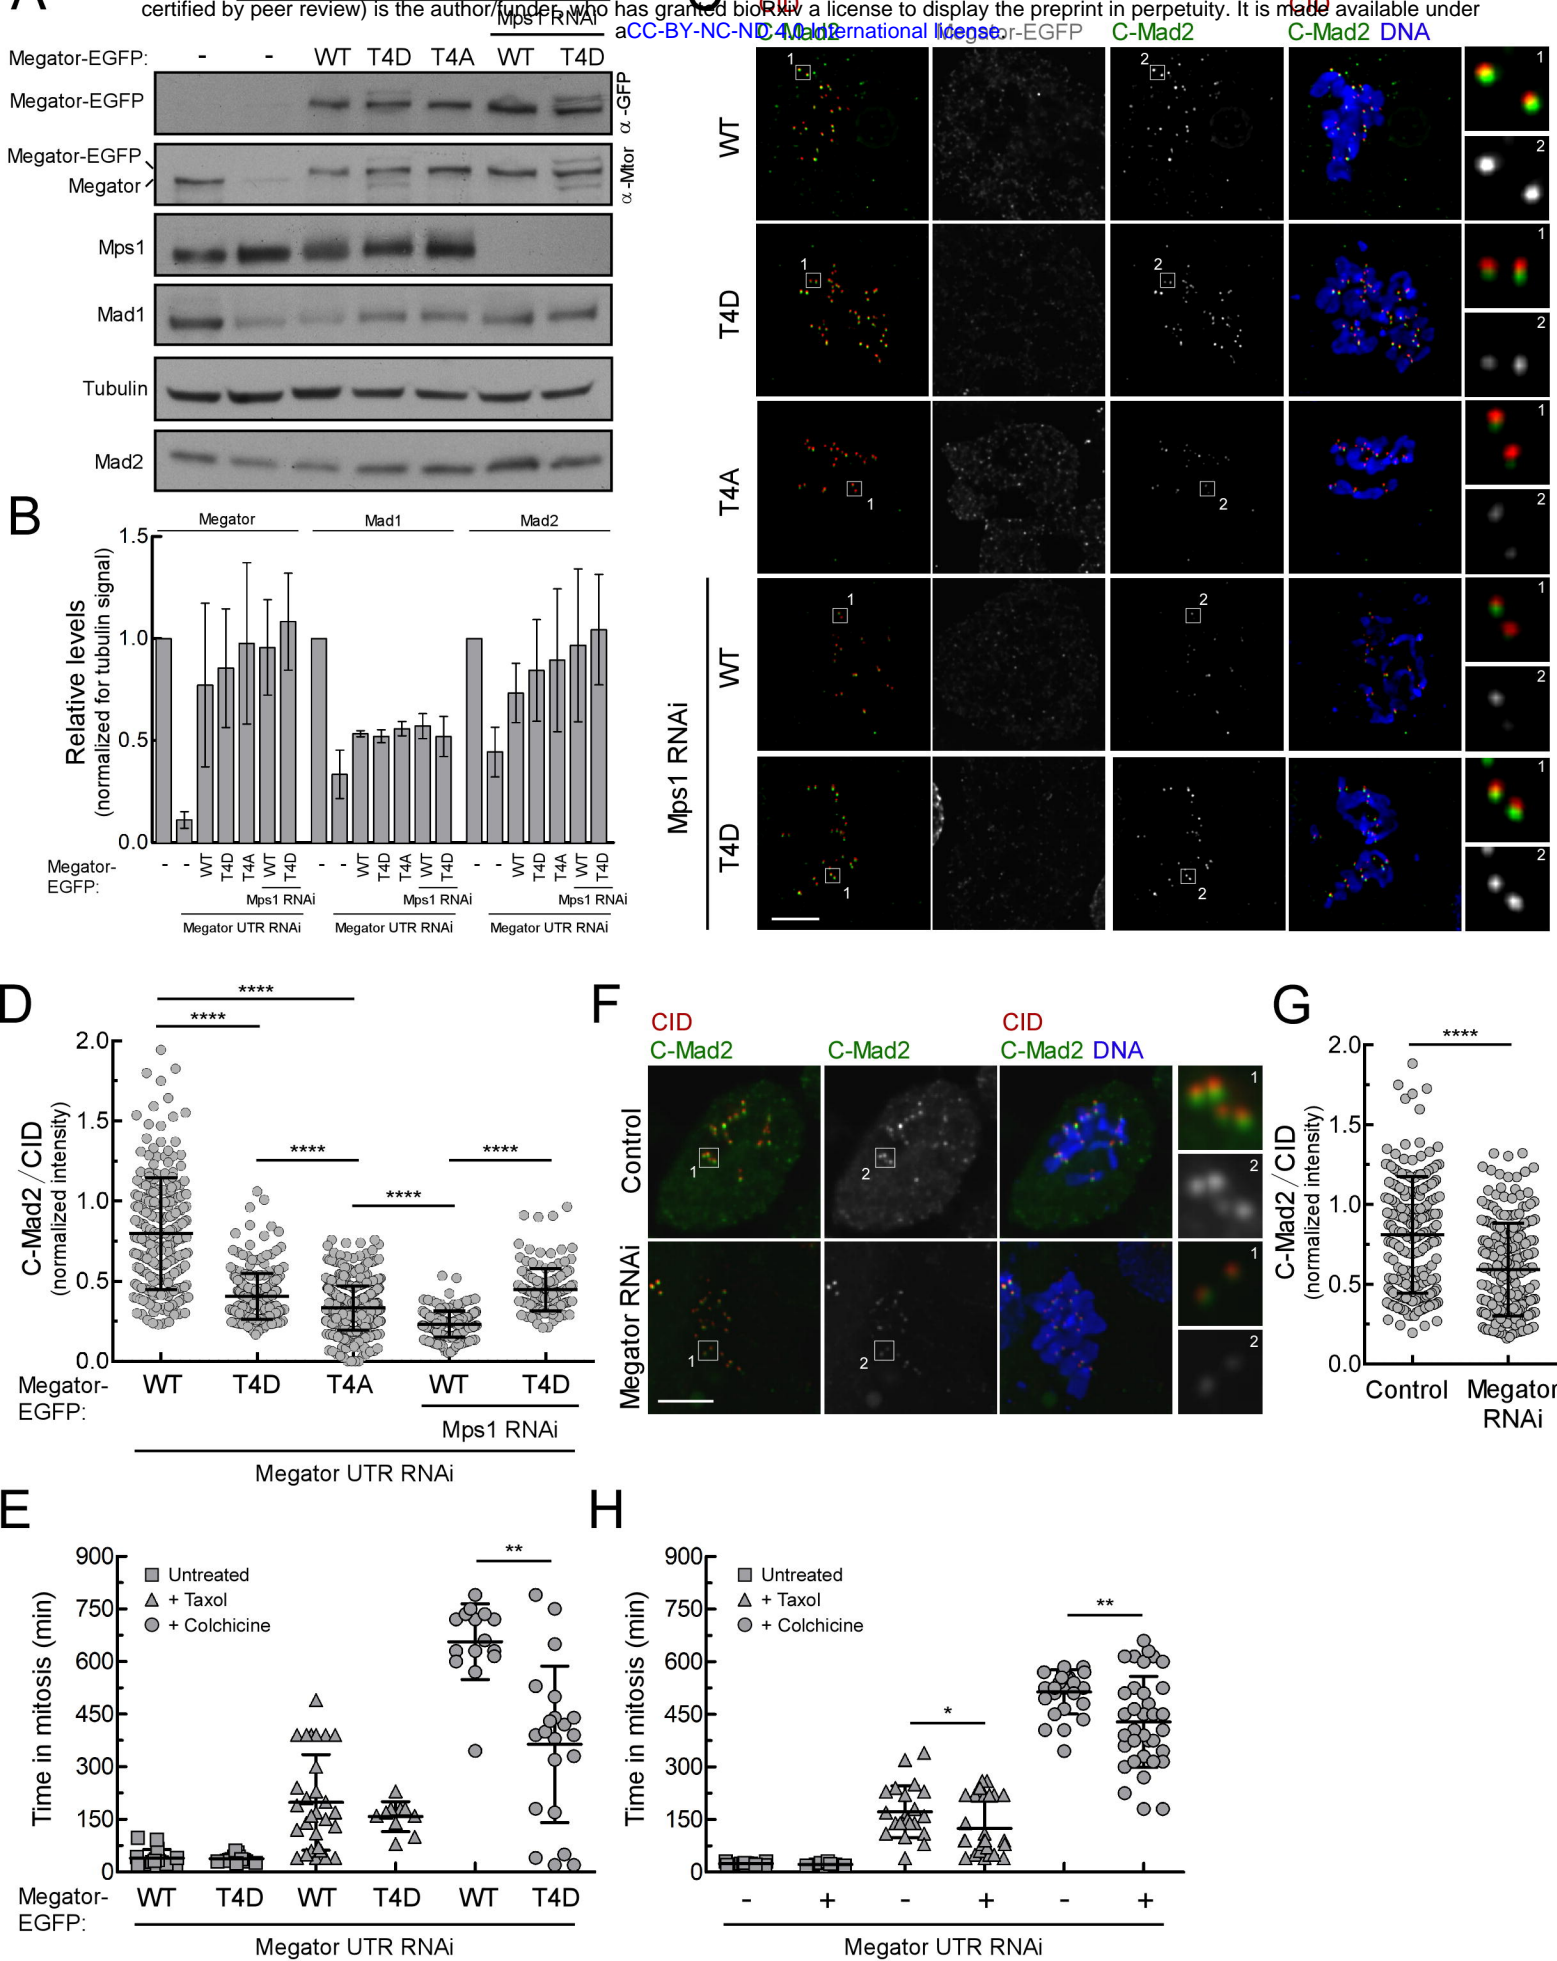



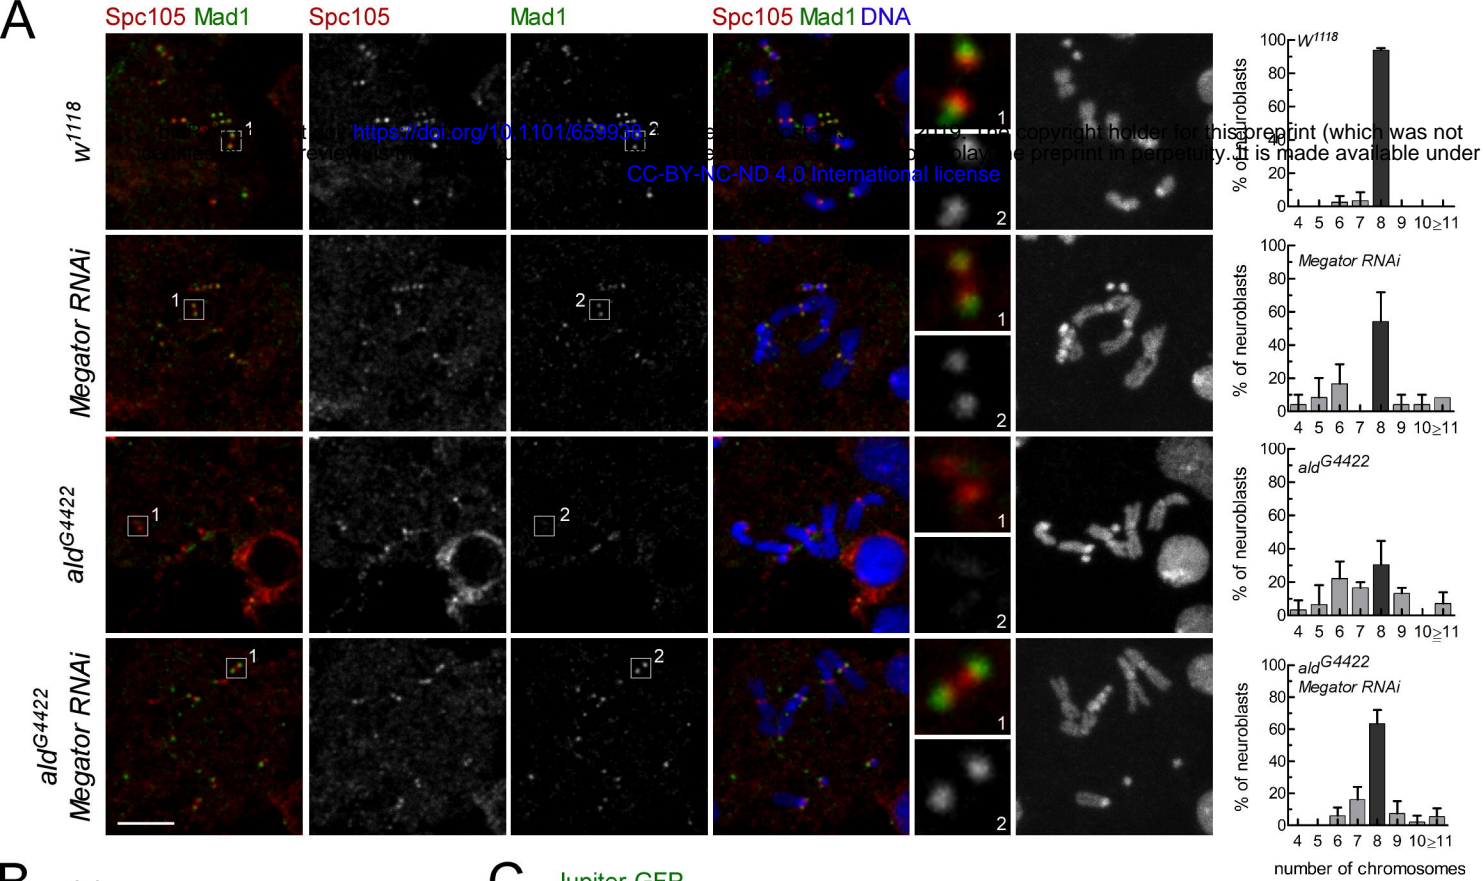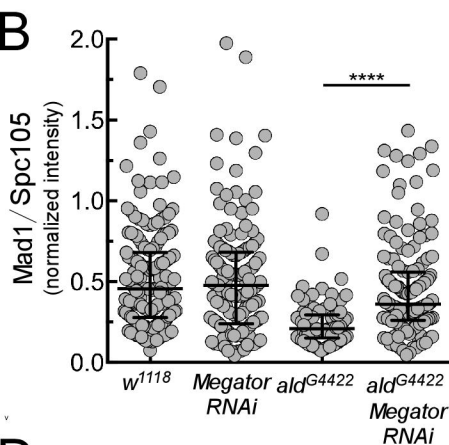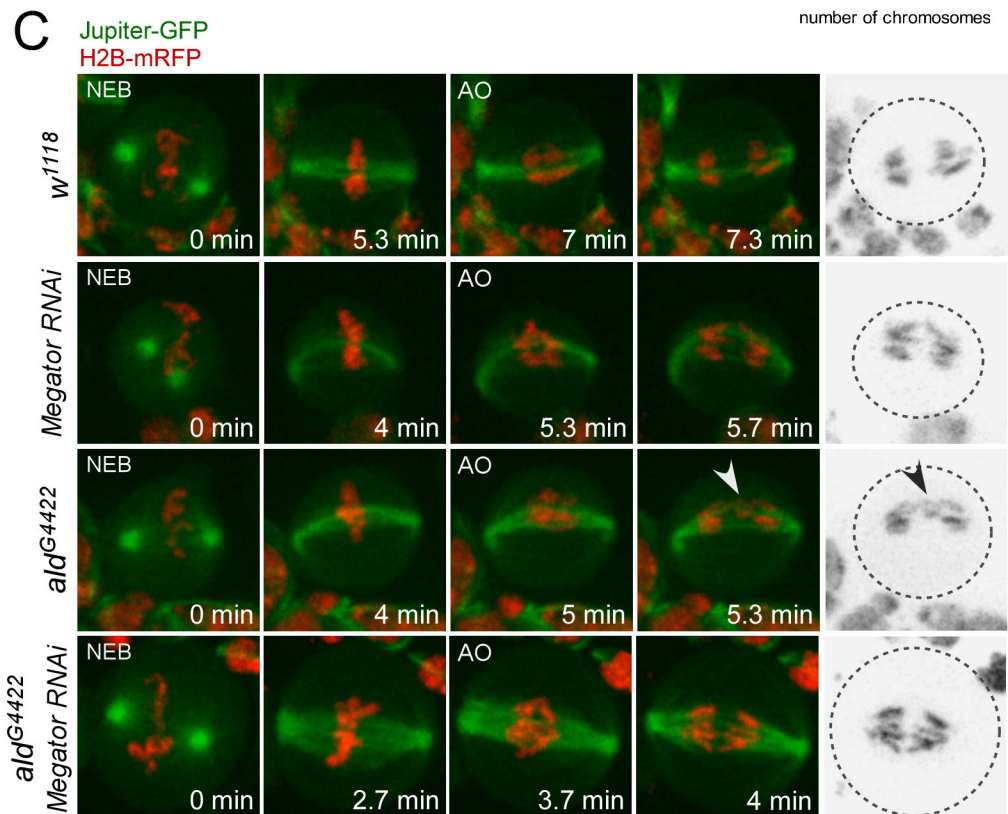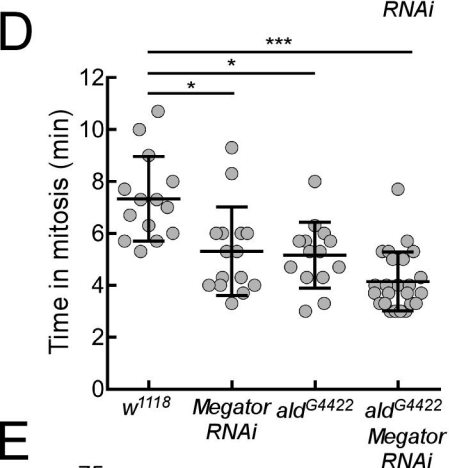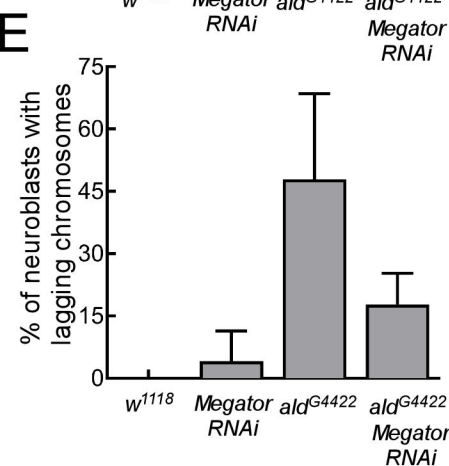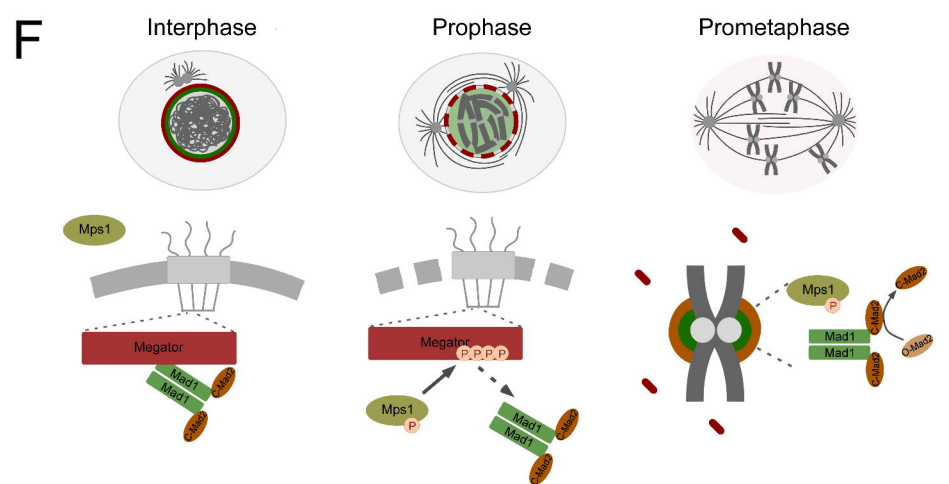

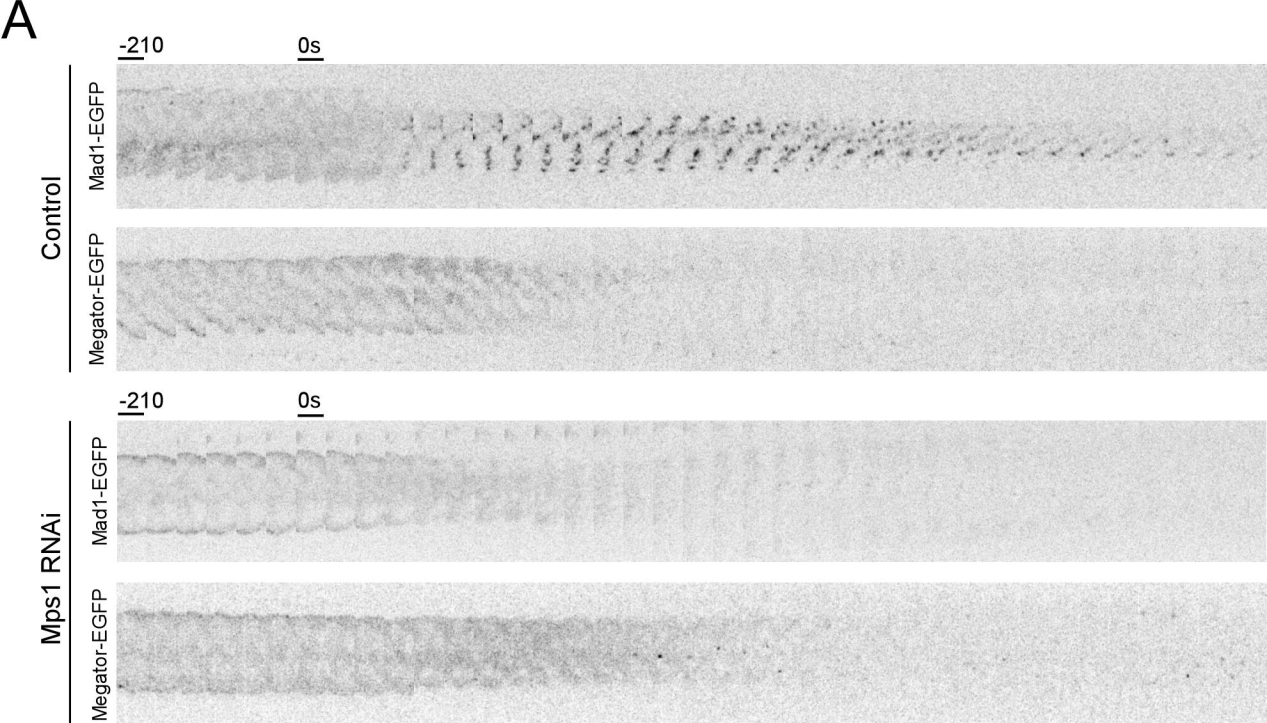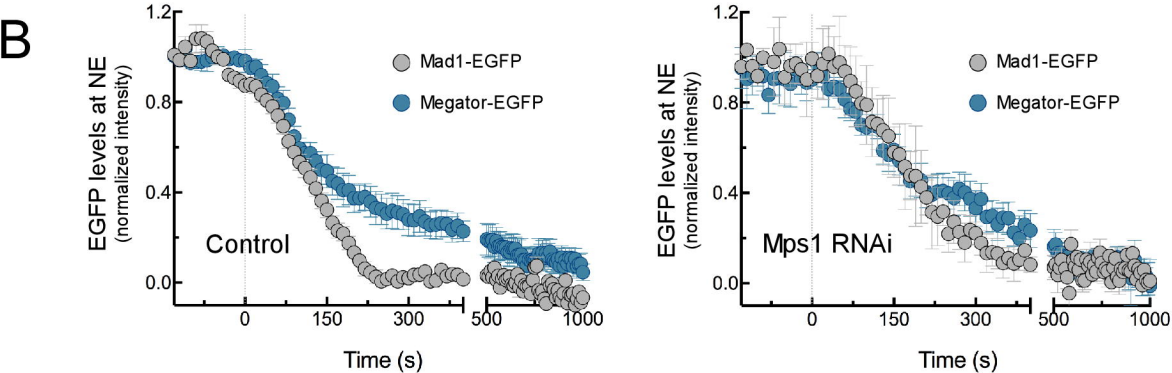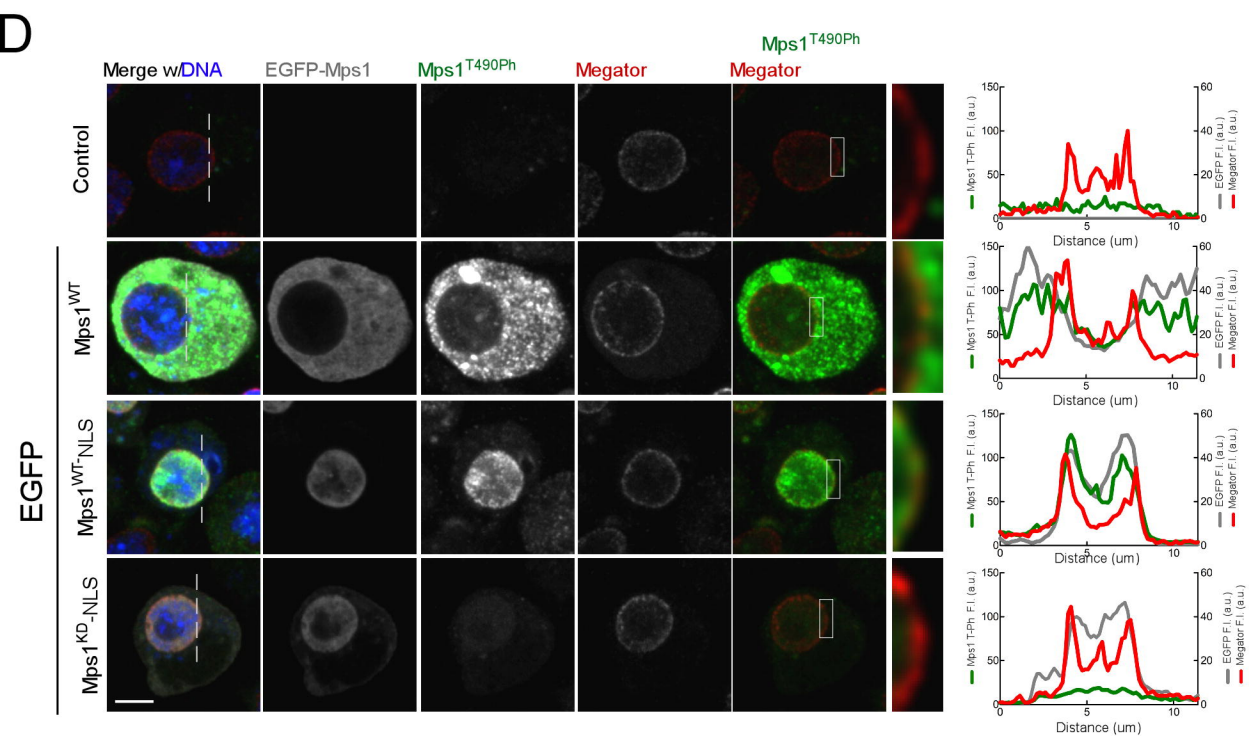



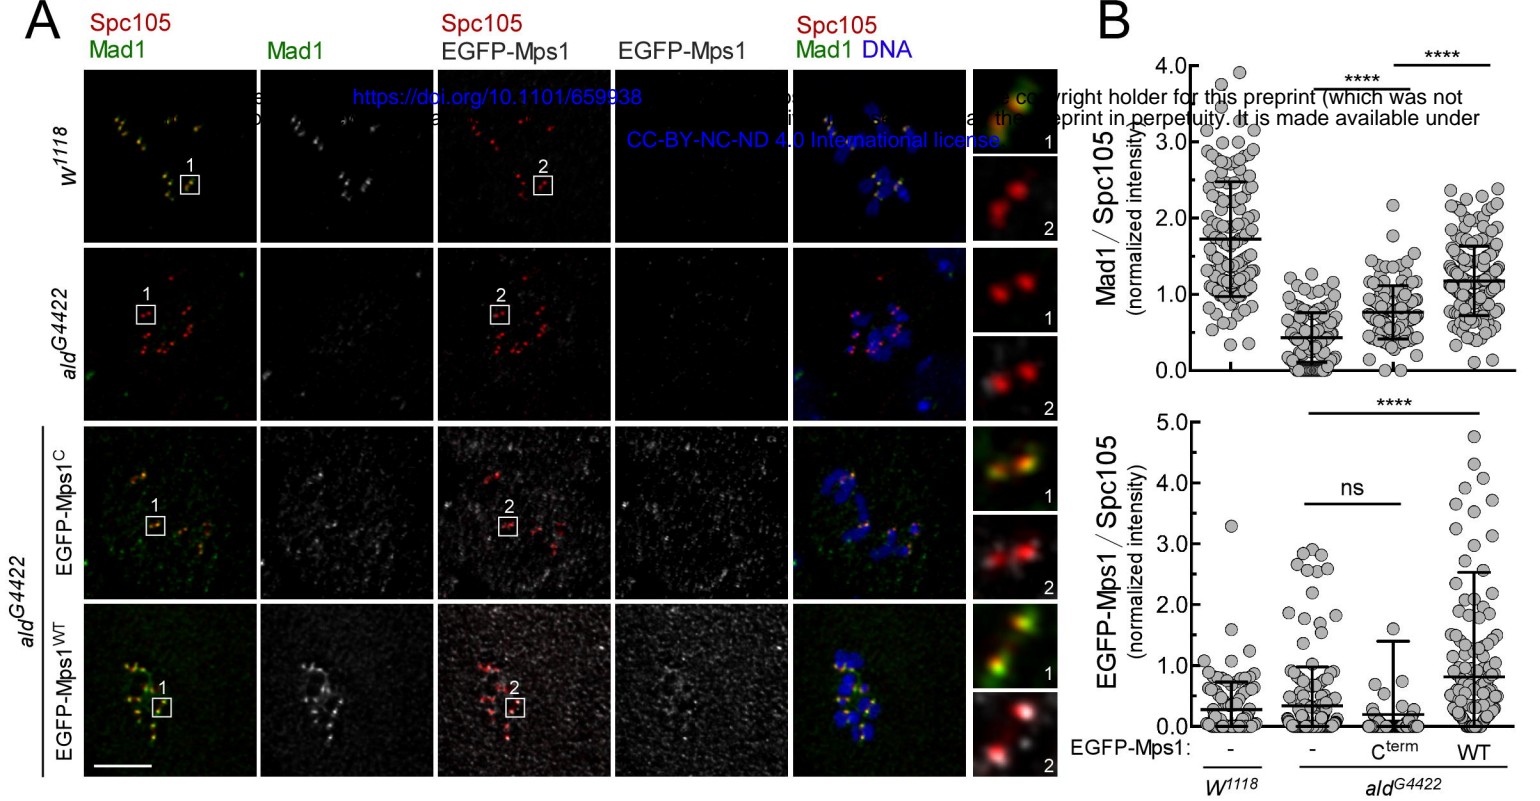

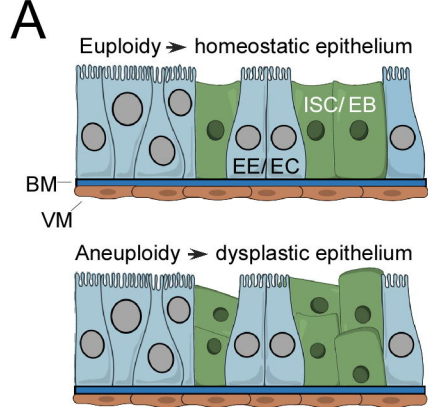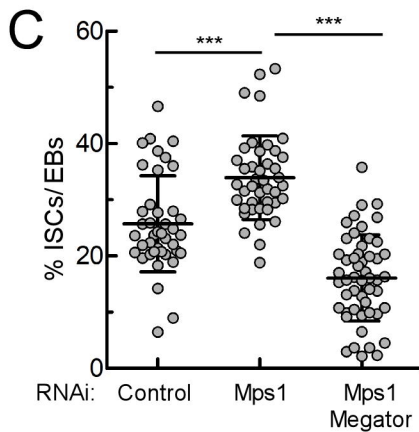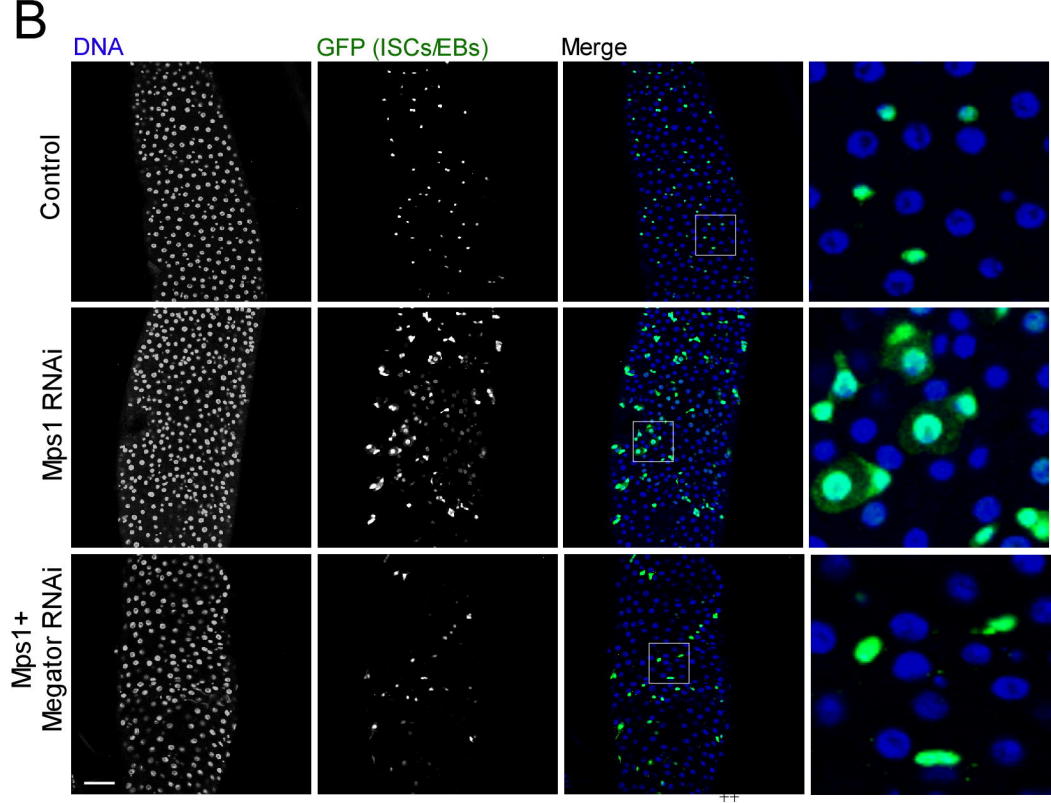

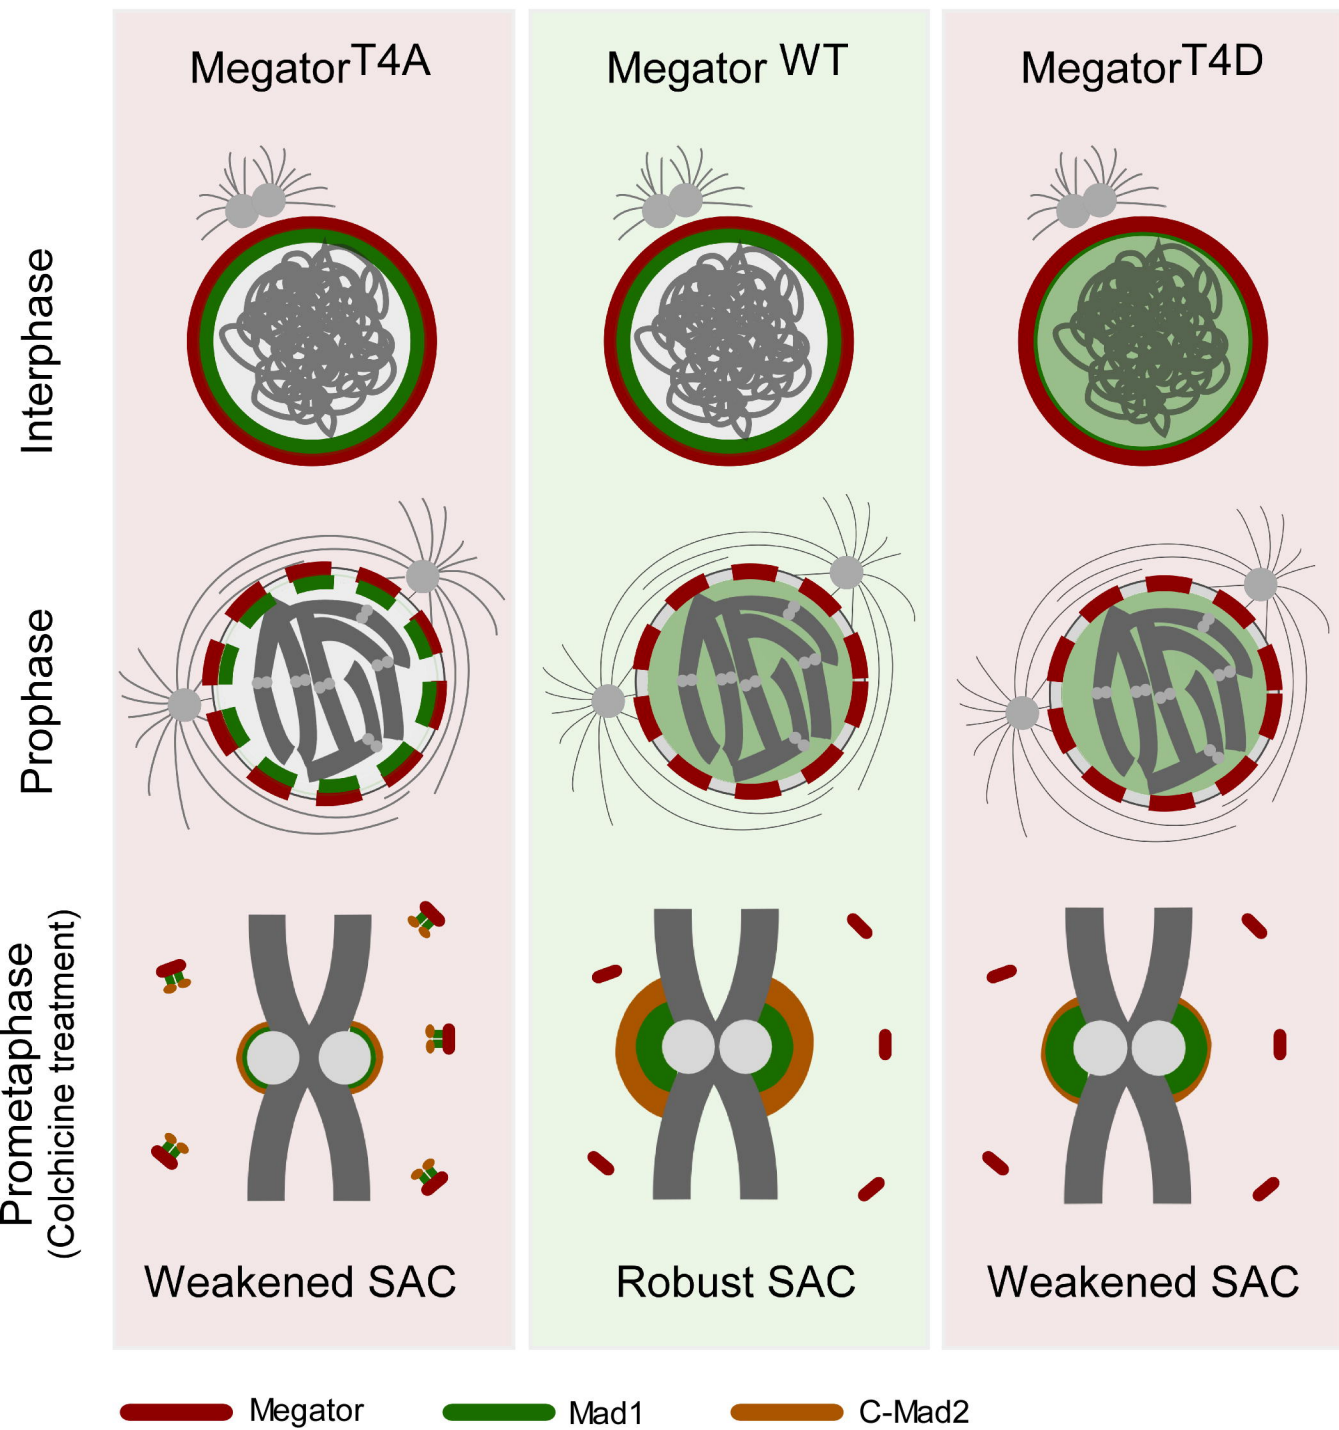

Source: https://biorxiv.org/content/biorxiv/early/2019/06/04/659938.full-text.pdf
